# Supplementary material for: MCJ: A mitochondrial target for cardiac intervention in pulmonary hypertension
Source: PubMed Central journal article supplement — Sci Adv. 2024 Jan 19;10(3):eadk6524. doi: 10.1126/sciadv.adk6524 (PMC10798563; doi:10.1126/sciadv.adk6524), 2024-01-19
Supplement: sciadv.adk6524_sm.pdf [file sciadv.adk6524_sm.pdf]

Supplementary Materials for  
**MCJ: A mitochondrial target for cardiac intervention in pulmonary hypertension**

Ayelén M. Santamans *et al.*

Corresponding author: Guadalupe Sabio, [gsabio@cnic.es](mailto:gsabio@cnic.es)

*Sci. Adv.* **10**, eadk6524 (2024)  
DOI: 10.1126/sciadv.adk6524

**The PDF file includes:**

Figs. S1 to S13  
Tables S1 and S2  
Legend for table S3

**Other Supplementary Material for this manuscript includes the following:**

Table S3

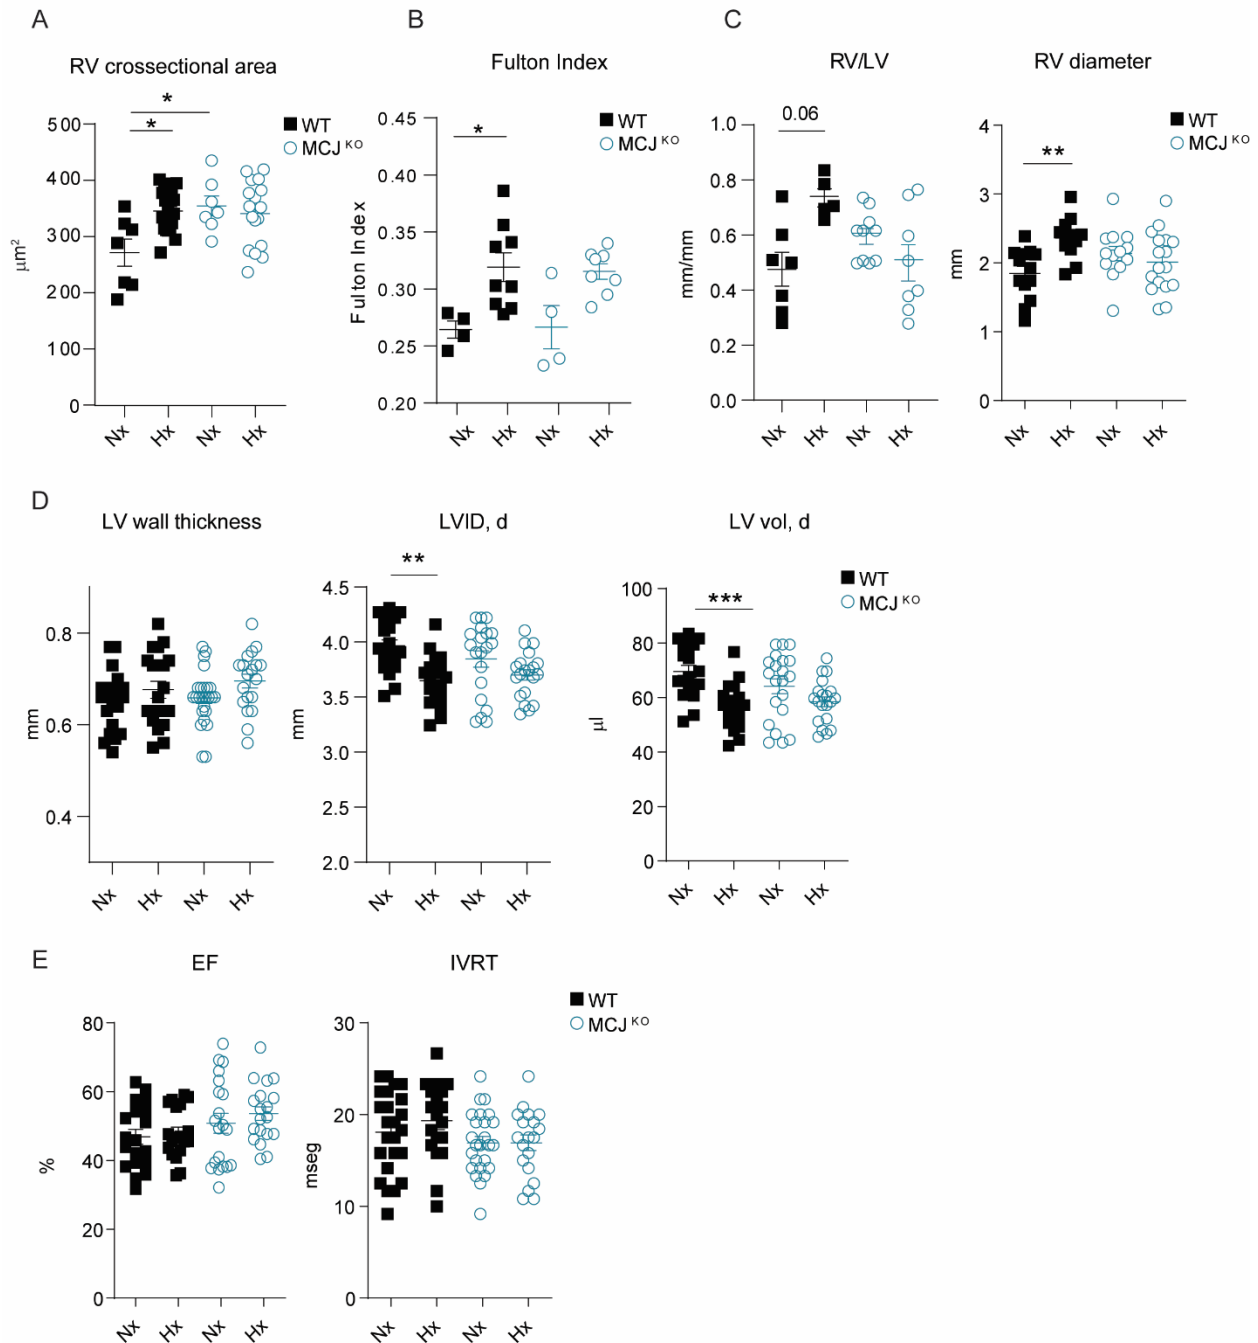

**Fig. S1. MCJ deletion preserves RV and LV morphology and function after chronic hypoxia.**

WT and MCJ<sup>KO</sup> mice subjected to normoxia (Nx) or 28 days hypoxia (Hx, 10% O<sub>2</sub>). **(A)** RV cardiomyocyte cross-sectional area by WGA immunostaining (n=7-18). **(B)** Fulton Index (n=4-9). **(C-E)** Echocardiography measured parameters in Nx and Hx: ratio between RV diameter/LV diameter; RV dilation shown as RV diameter; LV wall thickness (average of IVS; d and LVPW; d); LVID; d, left ventricular internal diameter in diastole; LV vol; d, left ventricular volume in

diastole; EF (%), ejection fraction; IVRT, isovolumetric relaxation time (n=12-22). All data are presented as mean  $\pm$  s.e.m. Statistical comparison by two-way ANOVA with Tukey post-test (a,b,c,d,e): NS (non-significant), \*P < 0.05, \*\*P < 0.01, \*\*\*P < 0.001. IVS; d interventricular septum thickness in diastole; LVPW; d, left ventricle posterior wall thickness in diastole.

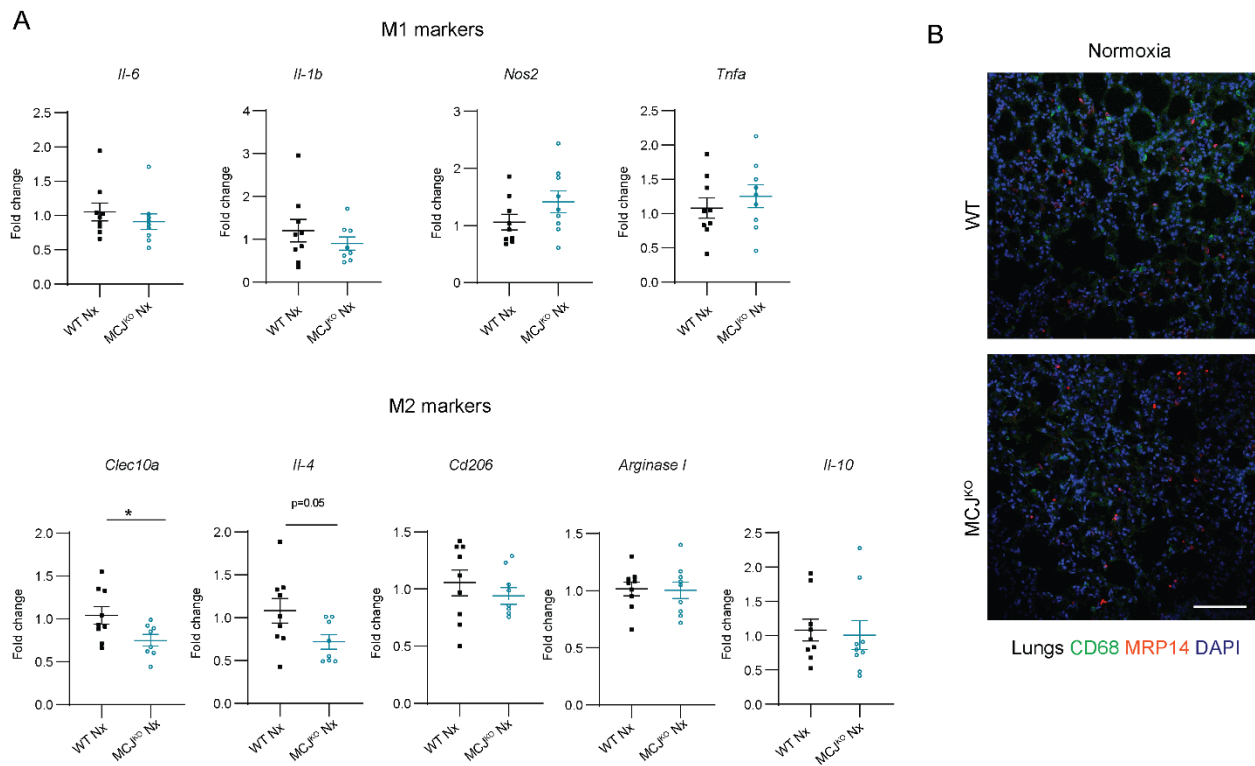

**Fig. S2. Lack of MCJ does not influence the basal pulmonary immune cell infiltration or the M1/M2 profile.**

**(A)** Lung expression profile of baseline M1 and M2 markers in WT and MCJ<sup>KO</sup> mice (Nx, 21% O<sub>2</sub>) analyzed by qPCR (n=8-9). The data is expressed as fold change relative to WT Nx; GAPDH expression levels were used to normalize the data. **(B)** Lung immunofluorescence showing infiltration by macrophages (CD68) and neutrophils (MRP14) in normoxic lungs. Nuclei stained with DAPI. Scale bar, 100  $\mu$ m. All data are presented as mean  $\pm$  s.e.m. Statistical comparison by student's t-test (a): NS (nonsignificant), \*P < 0.05, \*\*P < 0.01, \*\*\*P < 0.001.

A

Supp figure 3

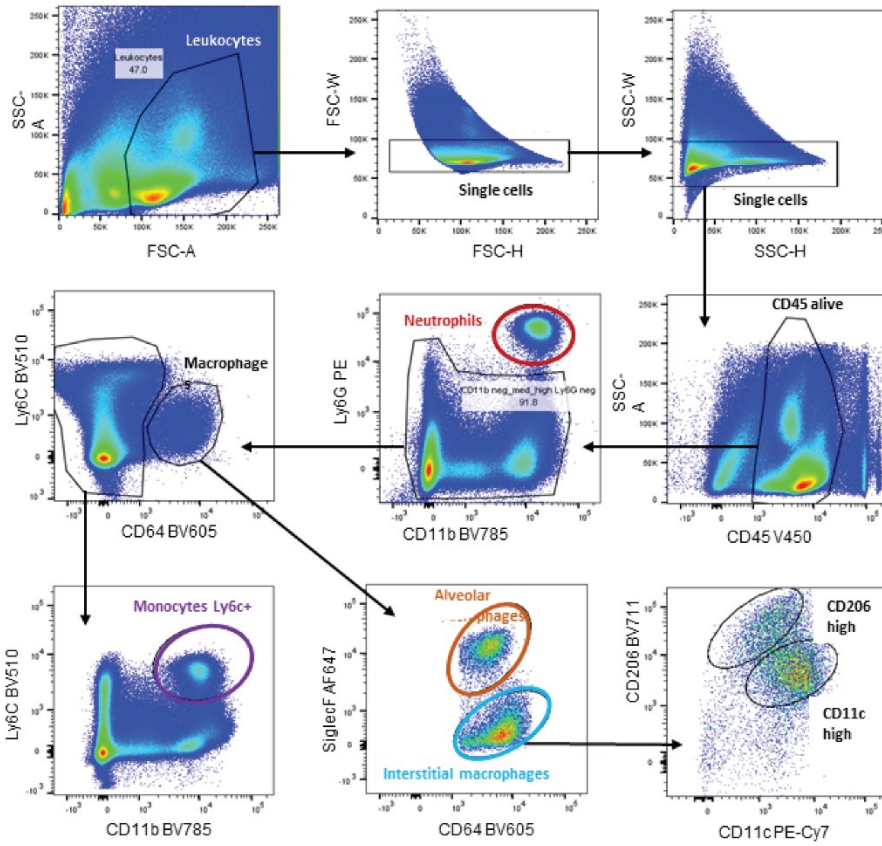

B

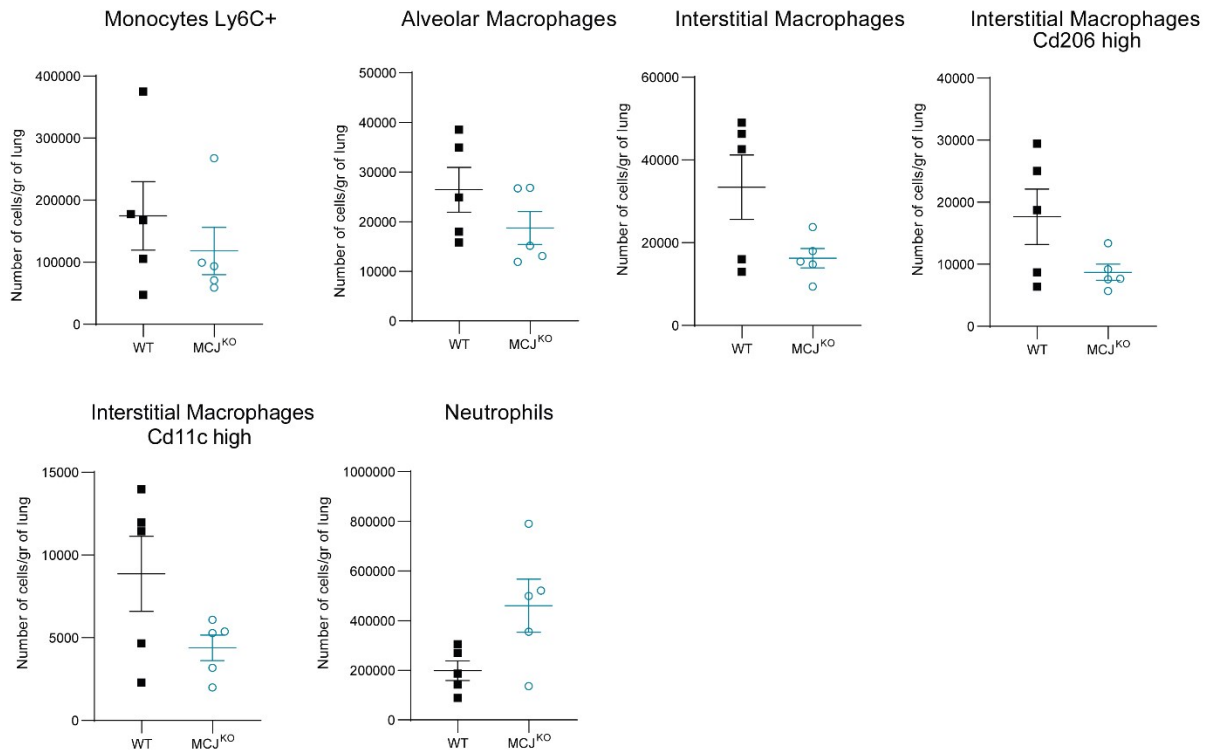

**Fig. S3. WT and MCJ<sup>KO</sup> mice presented no difference in the pulmonary immune cell infiltration and phenotype.**

**(A)** Gating strategy for the analysis of myeloid populations in the stromal vascular fraction. Representative plots are from lungs of normoxic WT mice. Cells were selected based on size and complexity, single cells and viability (DAPI<sup>-</sup>). Neutrophils (CD45<sup>+</sup>Ly6G<sup>+</sup>CD11b<sup>high</sup>), monocytes (CD11b<sup>+</sup>Ly6G<sup>-</sup>Ly6C<sup>+</sup>) and macrophages (CD11b<sup>+</sup>Ly6G<sup>-</sup>Ly6C<sup>-</sup>CD64<sup>+</sup>) were analyzed. Within the macrophages population we identified alveolar (SiglecF<sup>+</sup>CD64<sup>+</sup>) and interstitial (SiglecF<sup>-</sup>CD64<sup>+</sup>) subpopulations. Population of interstitial macrophages was further characterized as two macrophage subtypes: CD11c<sup>+</sup>CD206<sup>-</sup> and CD11c<sup>-</sup>CD206<sup>+</sup> using the indicated markers. **(B)** The number of immune cells was estimated in the stromal vascular fraction of WT and MCJ<sup>KO</sup> mice and was normalized by grams of tissue. All data are presented as mean ± s.e.m. Statistical comparison by Student's t-test (b): NS, \*P < 0.05, 67 \*\*P < 0.01, \*\*\*P < 0.001.

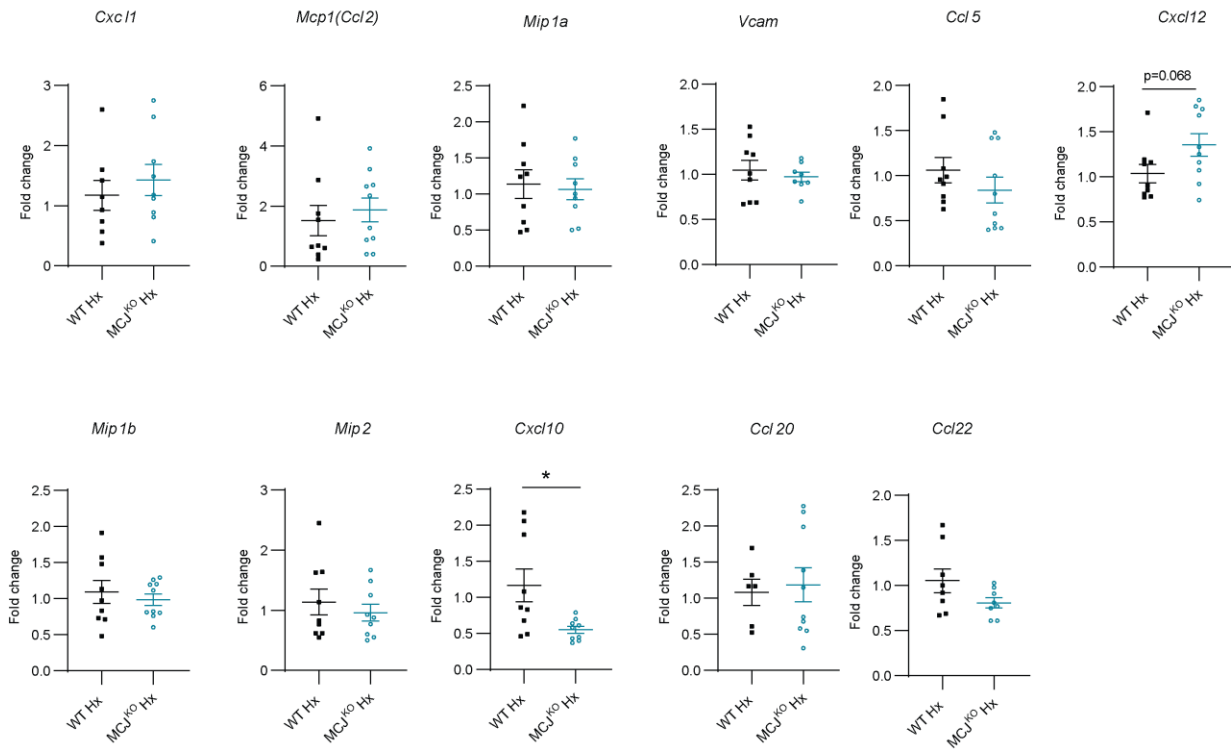

**Fig. S4. Lack of MCJ leads to mild alteration of the pulmonary chemokine expression profile after hypoxia.**

Lung expression profile of chemokines in WT and MCJ<sup>KO</sup> mice exposed to hypoxia (Hx, 10% O<sub>2</sub>) (n=6-10). All data are presented as mean ± s.e.m. Statistical comparison by student's t-test: NS (nonsignificant), \*P < 0.05, \*\*P < 0.01, \*\*\*P < 0.001.

A

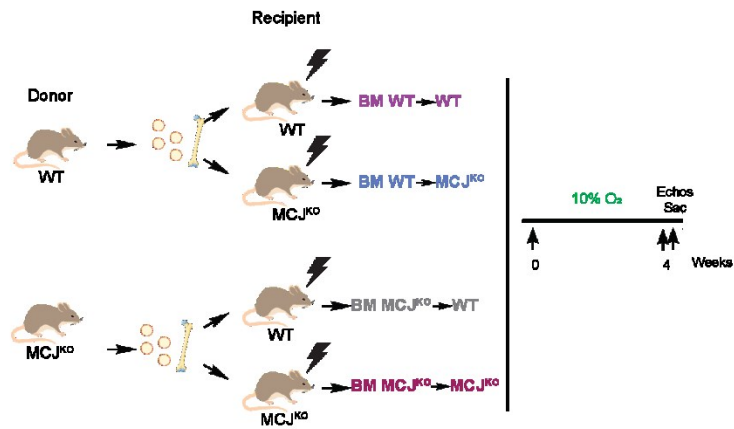

B

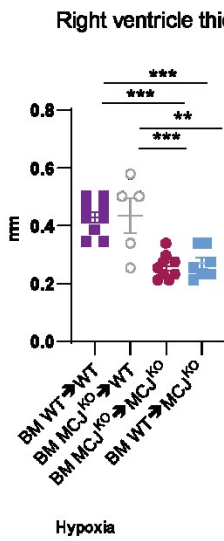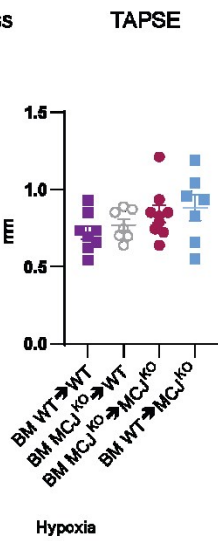

C

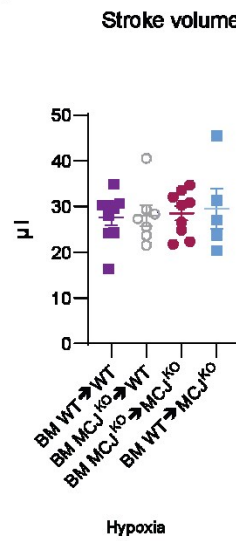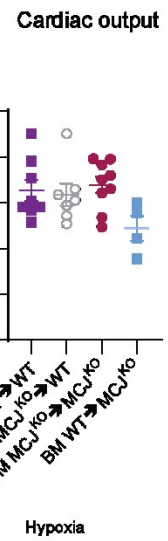

D

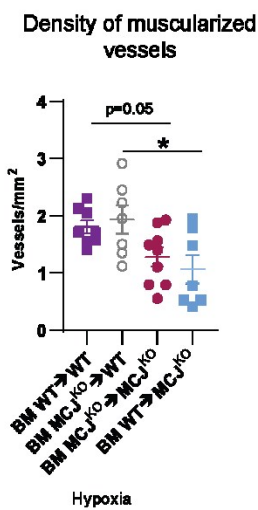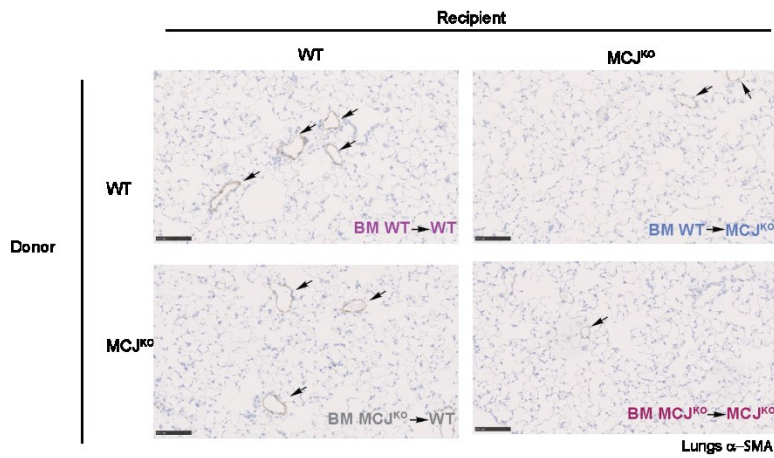



**Fig. S5. MCJ<sup>KO</sup> mice are protected against PH independently of their immune cell population.**

(A) WT and MCJ<sup>KO</sup> mice were irradiated and their bone marrow was reconstituted with donor cells from WT or MCJ<sup>KO</sup> mice. After reconstitution, mice were exposed to hypoxia for 4 weeks and the cardiac and pulmonary phenotype was evaluated. (B) Echocardiography assessment of right ventricle hypertrophy (right ventricle thickness) and function (tricuspid annular plane systolic excursion, TAPSE) in hypoxic mice (n=5-9). (C) Echocardiography assessment of stroke volume and cardiac output in hypoxic mice (n=5-9). (D) Muscularized vessel density in lungs of mice exposed to hypoxia with a representative immunohistochemistry of  $\alpha$ -smooth muscle actin ( $\alpha$ -SMA) in hypoxic lungs (n=7-9). Scale bars, 100  $\mu$ m. All data are presented as mean  $\pm$  s.e.m. Statistical comparison by one-way ANOVA with Tukey post-test (b,c,d): NS, \*P < 0.05, \*\*P < 0.01, \*\*\*P < 0.001. Panel A prepared using modified figures from Servier Medical Art (<https://smart.servier.com/>), licensed under a Creative Commons Attribution 3.0 unported license.

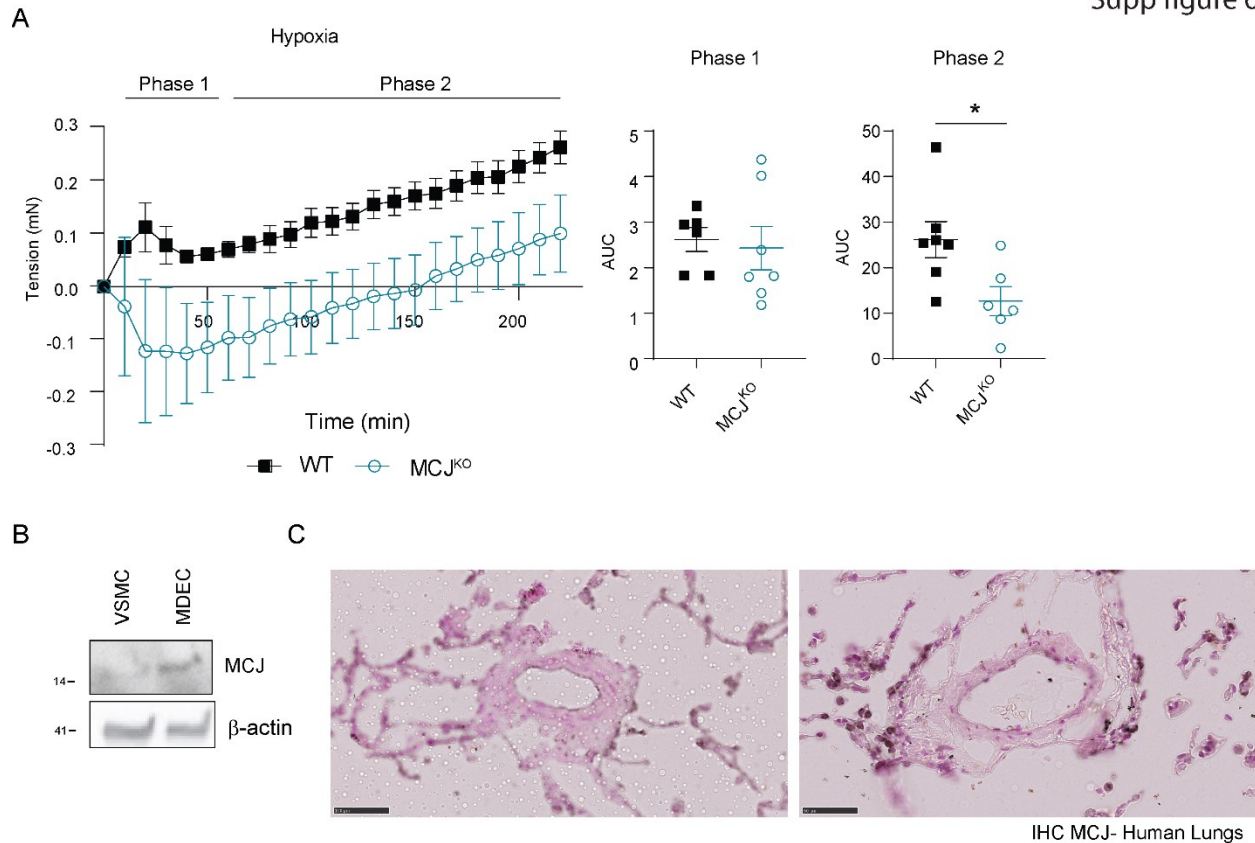

**Fig. S6. MCJ contributes to the EC-dependent sustained phase of hypoxic vasoconstriction.**

(A) Contractile responses of isolated pulmonary arteries from WT and MCJ<sup>KO</sup> mice exposed to acute Hx (1% O<sub>2</sub>) (n=6-7). The inset graph shows area under the curve [AUC] for phase 1 and 2 of the myography. (B) Immunoblot showing MCJ expression in vascular smooth muscle cells (VSMC) and endothelial cells (EC). (C) Immunohistochemistry against MCJ in vessels from human lung samples. Scale bar: 100 μm. All data are presented as mean ± s.e.m. Statistical comparison by two-tailed Student t-test (a): NS, \*P < 0.05, \*\*P < 0.01, \*\*\*P < 0.001.

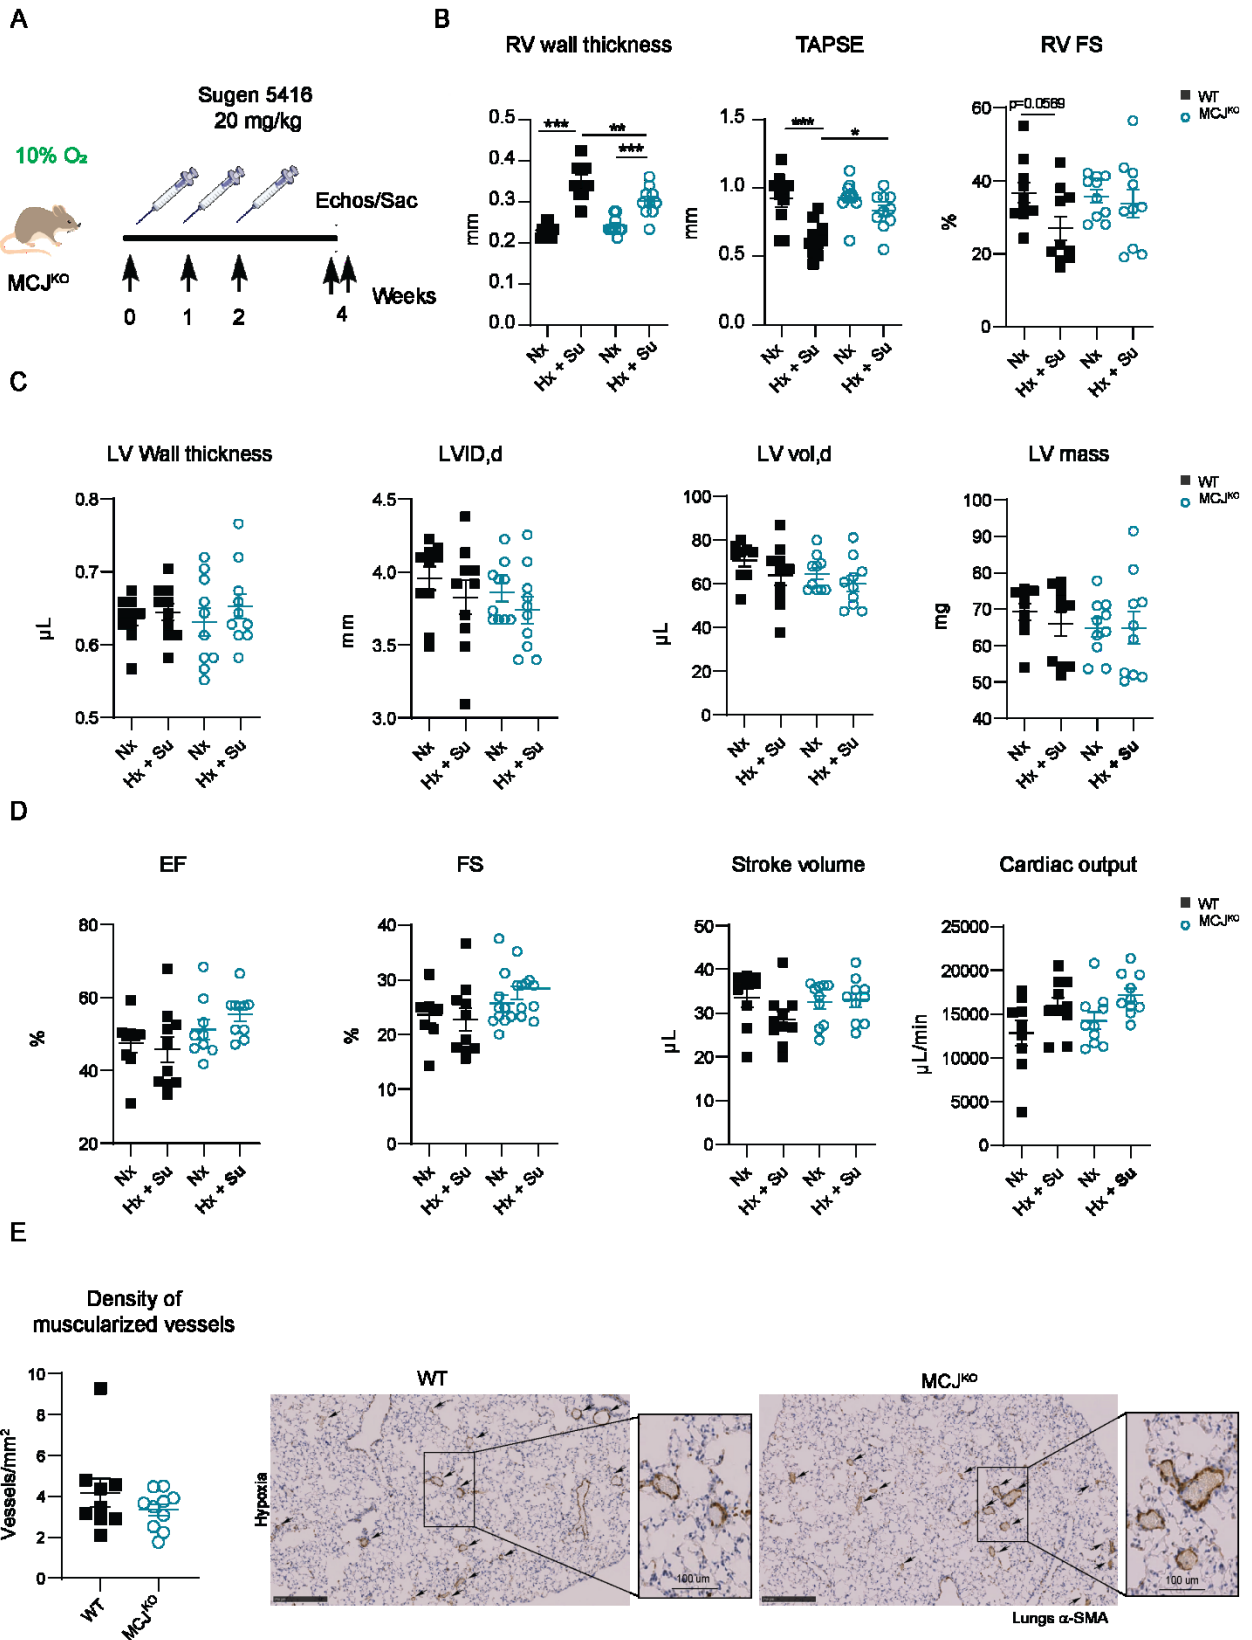

Fig. S7. MCJ deletion conserves cardiac function despite RV hypertrophy and pulmonary

## vascular remodeling in a more severe PAH model of hypoxia with Sugen 5416.

**(A)** Experimental scheme for A-E. WT and MCJ<sup>KO</sup> mice were i.p. injected at 0,1 and 2 weeks with 20 mg/kg of Sugen 5416 (Su) during chronic hypoxia exposure (Hx, 10% O<sub>2</sub>), normoxic mice were kept at normoxia (Nx, 21% O<sub>2</sub>) for 4 weeks, and cardiac and pulmonary phenotypes were characterized. **(B)** Echocardiography assessment of right ventricle hypertrophy (right ventricle thickness) and function (tricuspid annular plane systolic excursion, TAPSE and right ventricular fractional shortening, RV FS) (n=9-10). **(C)** Left ventricle characterization (n=9-10). Wall thickness, left ventricular diameter in diastole (LVID,d), left ventricular volume in diastole (LV vol, d) and left ventricular mass (LV mass) were assessed. **(D)** Assessment of left ventricle function (n=9-10). Ejection fraction (EF), fractional shortening (FS), stroke volume and cardiac output were estimated. **(E)** Muscularized vessel density in lungs of mice exposed to hypoxia with a representative immunohistochemistry of  $\alpha$ -smooth muscle actin ( $\alpha$ -SMA) in hypoxic lungs (n=9-10). Scale bars, 250  $\mu$ m, 100  $\mu$ m (vessel). All data are presented as mean  $\pm$  s.e.m. Statistical comparison by two-tailed Student t-test (e) or two-way ANOVA with Tukey post-test (b,c,d): NS, \*P < 0.05, \*\*P < 0.01, \*\*\*P < 0.001. Panel A prepared using modified figures from Servier Medical Art (<https://smart.servier.com/>), licensed under a Creative Commons Attribution 3.0 unported license.

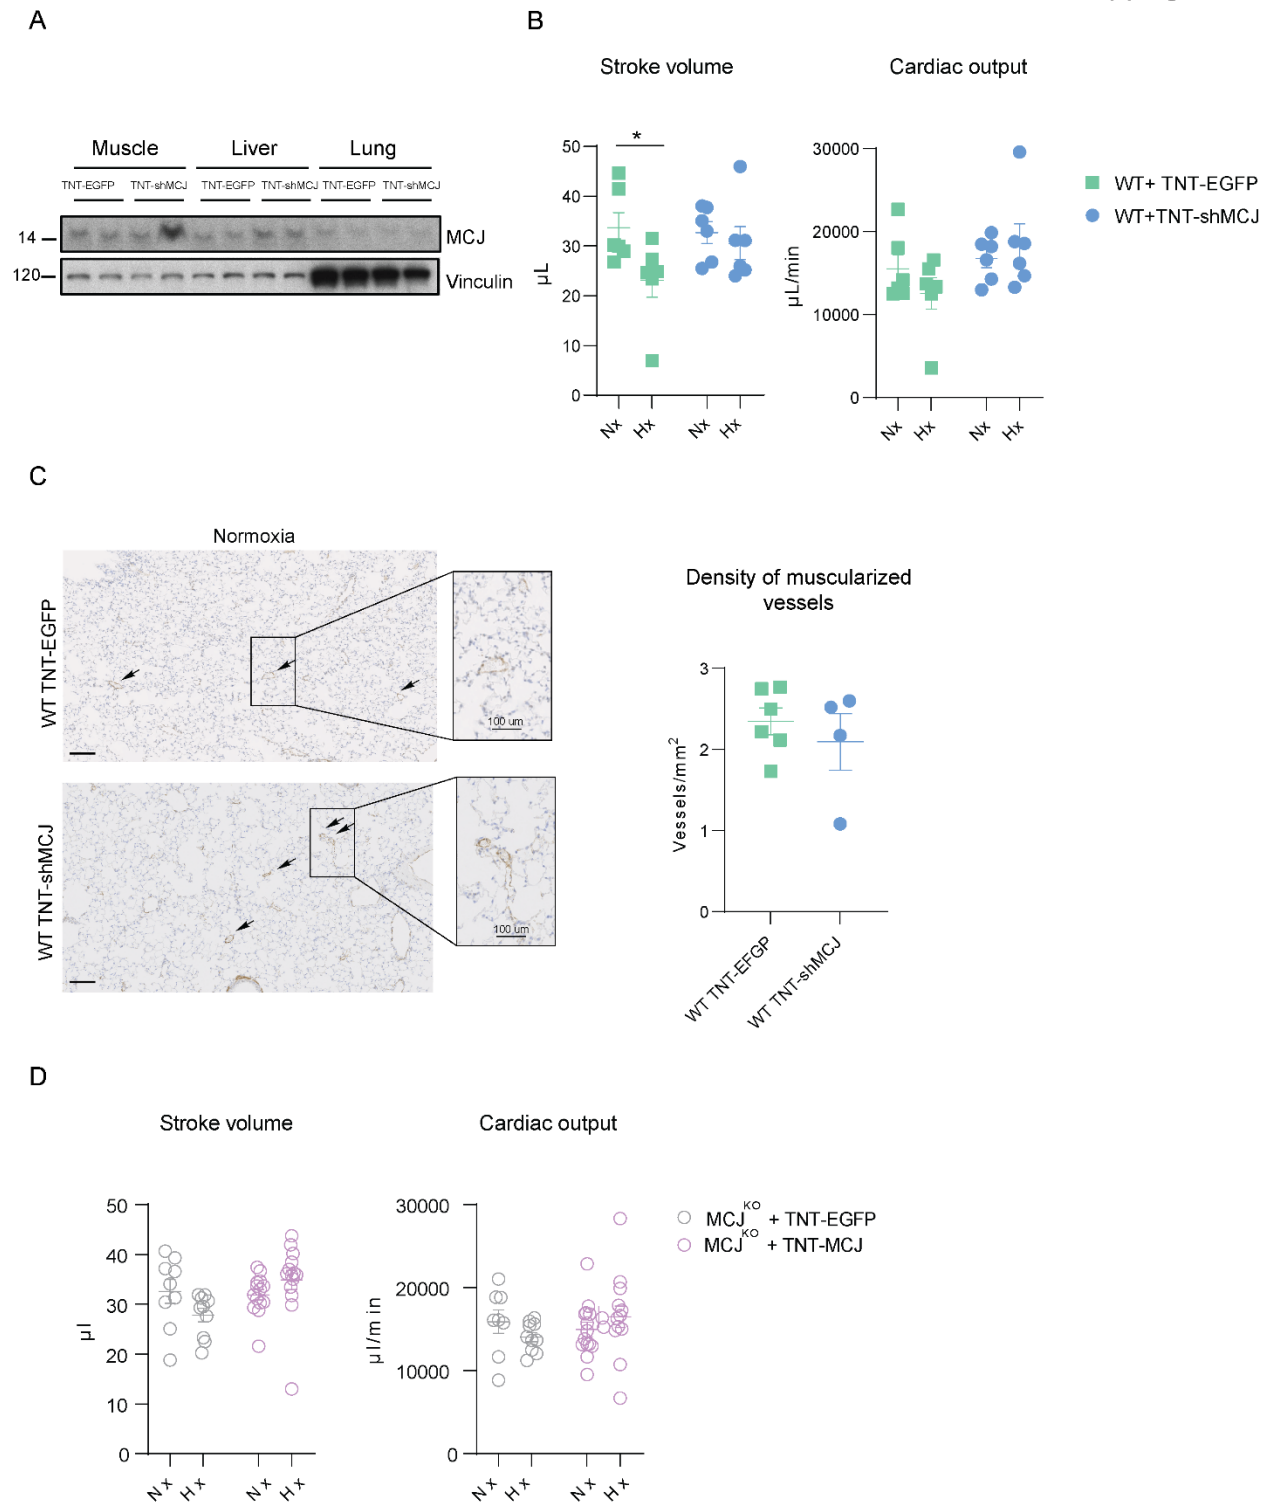

**Fig. S8. Effects of cardiac-specific MCJ modulation in normoxia and hypoxia.**

(A-C) WT mice were i.v. injected at postnatal day 1 with pAAV-TnT-shMCJ adenovirus to silence specifically MCJ expression in cardiomyocytes (WT TNT-shMCJ) or with control AAV-

TNT-EGFP-Luc (WT TNT-EGFP). Adult mice were maintained in normoxia (Nx, 21% O<sub>2</sub>) or exposed to chronic hypoxia (Hx, 10% O<sub>2</sub>). **(A)** Immunoblot showing preservation of MCJ expression in muscle, liver, and lung of adult WT mice injected i.v. at postnatal day 1 with the MCJ-targeting adenovirus pAAV-TnT-shMCJ (WT TNT-shMCJ) or the control AAV-TNT-EGFP-Luc (WT TNT-EGFP). **(B)** Echocardiography assessment of stroke volume and cardiac output (n=6). **(C)** Representative immunohistochemistry of  $\alpha$ -smooth muscle actin ( $\alpha$ -SMA) in normoxic lungs, with amplification of remodelled vessel. Scale bars, 100  $\mu$ m, 100  $\mu$ m (vessel). **(D)** MCJ<sup>KO</sup> mice were i.v. injected at 4 weeks with pAAV-TnT-MCJ adenovirus to achieve cardiomyocyte-specific overexpression of MCJ (MCJ<sup>KO</sup> TNT-MCJ) or with control AAV-TNT-EGFP-Luc (MCJ<sup>KO</sup> TNT-EGFP). Adult mice were maintained in normoxia (Nx, 21% O<sub>2</sub>) or exposed to chronic hypoxia (Hx, 10% O<sub>2</sub>). Echocardiography assessment of stroke volume and cardiac output (n=8-14). All data are presented as mean  $\pm$  s.e.m. Statistical comparison by Student's t-test (c) and two-way ANOVA with Tukey post-test (b,d): NS, \*P < 0.05, 67 \*\*P < 0.01, \*\*\*P < 0.001.

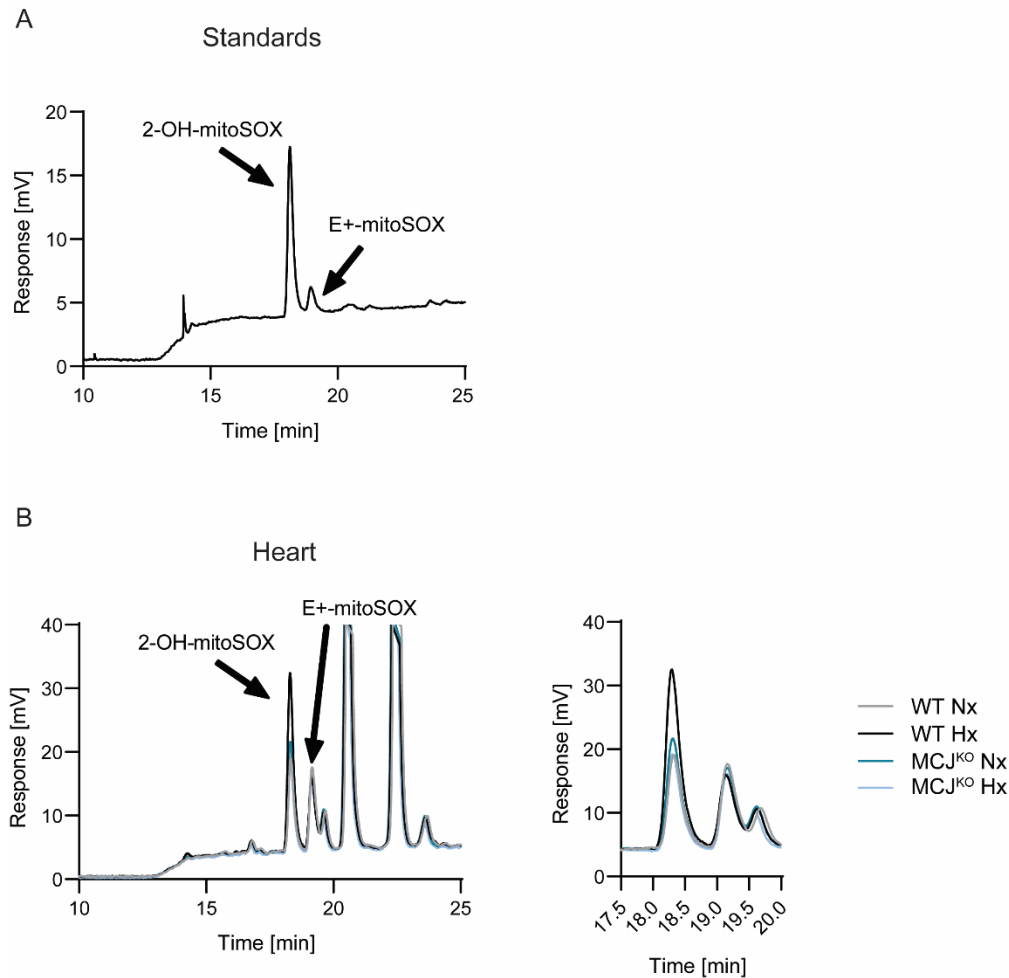

**Fig. S9. Detection of superoxide generation by mitoSOX HPLC in isolated cardiac mitochondria.**

(A) Representative chromatograms are shown for the 2-OH-mitoSOX and E+mitoSOX standards. (B) Representative chromatograms are shown for the HPLC-based quantification of 2-OH-mitoSOX and E+mitoSOX in isolated cardiac mitochondria from normoxic (21% O<sub>2</sub>) and hypoxic mice (10% O<sub>2</sub>, 7 days). HPLC: high-performance/pressure liquid chromatography; mitoSOX: mitochondria-targeted fluorescence dye triphenylphosphonium-linked hydroethidium.

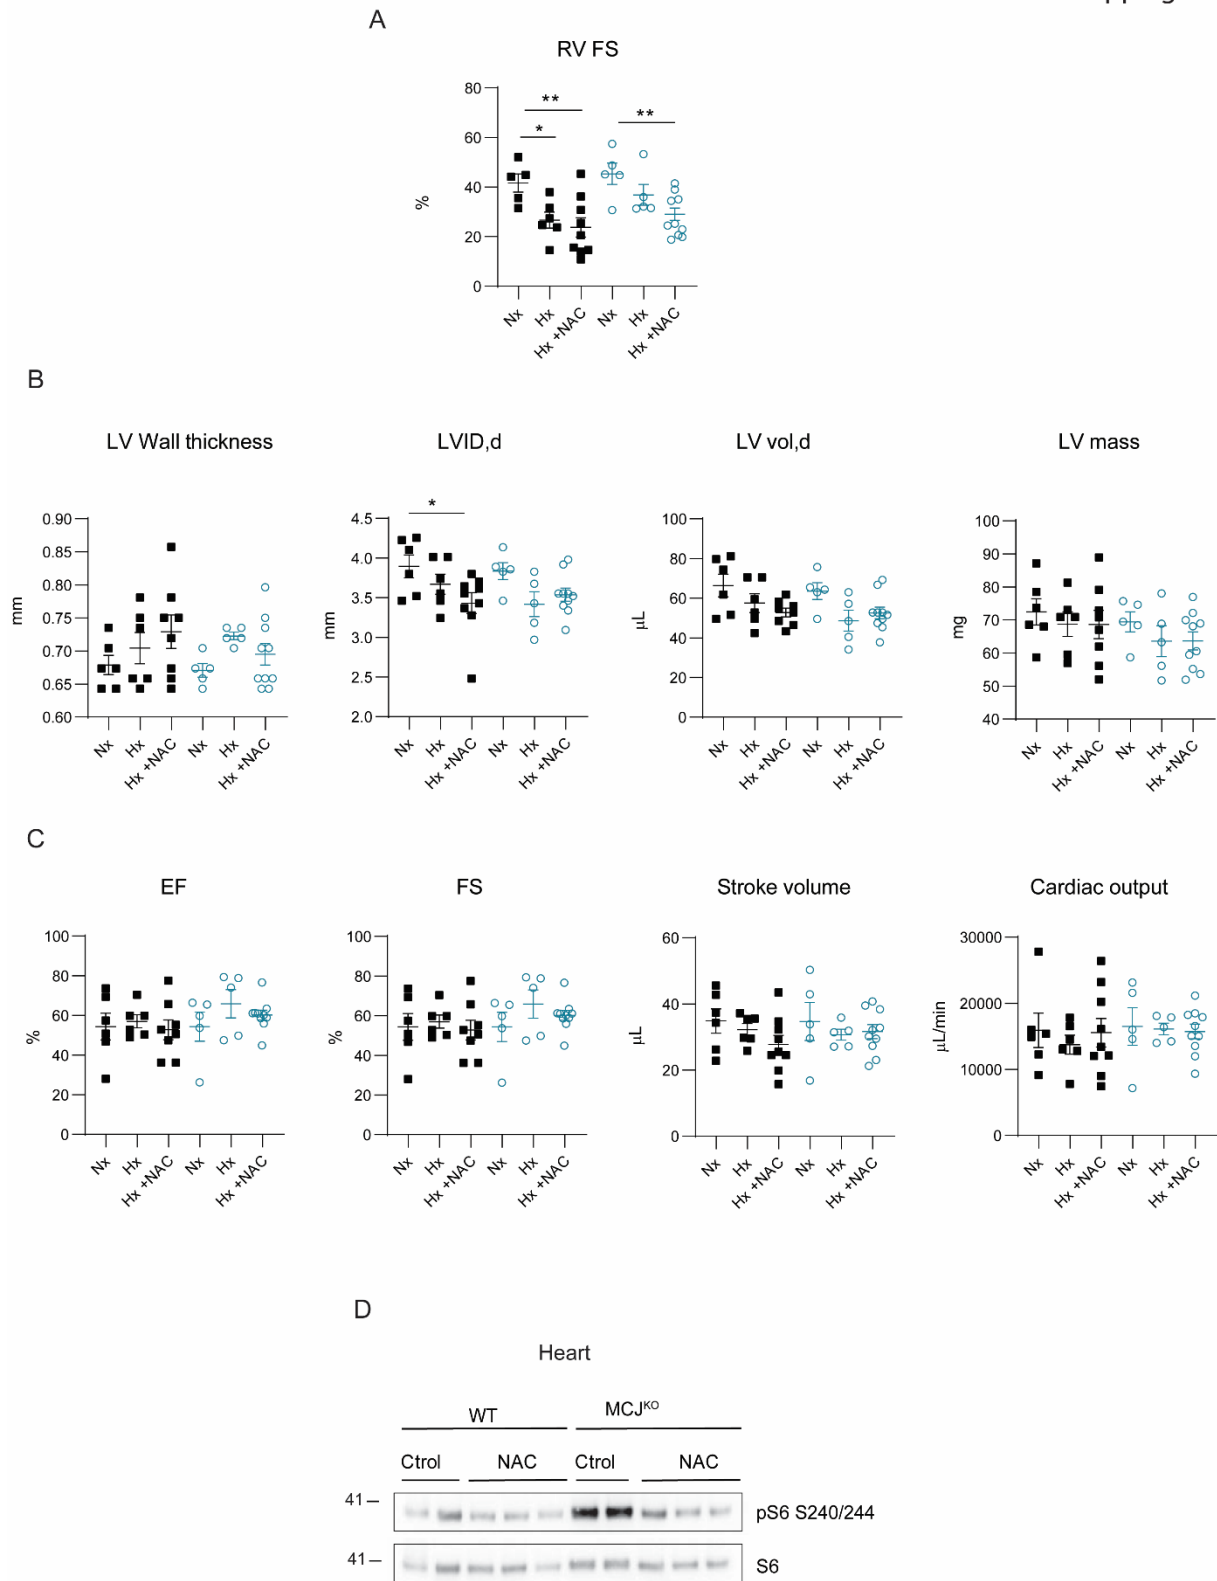

**Fig. S10. Mimicking the hypoxic ROS burst in MCJ<sup>KO</sup> mice leads to RV systolic**



### **dysfunction and LV dilation as in WT hypoxic mice.**

**(A-C)** WT and MCJ<sup>KO</sup> mice received NAC in drinking water for 2 weeks. After withdrawal of the treatment, they were exposed to chronic hypoxia (Hx, 10% O<sub>2</sub>). **(A)** Echocardiography assessment of right ventricle function as RV fractional shortening (n=5-10). **(B)** Left ventricle characterization (n=5-10). Wall thickness, left ventricular diameter in diastole (LVID,d), left ventricular volume in diastole (LV vol, d) and left ventricular mass (LV mass) were measured. **(C)** Assessment of left ventricle function (n=5-10). Ejection fraction (EF), fractional shortening (FS), stroke volume and cardiac output were estimated. **(D)** Mice were i.p. injected during 4 consecutive days with the ROS scavenger N-acetyl-L-cysteine (NAC) and sacrificed at day 5. Representative immunoblots of mTOR pathway activation in normoxic WT and MCJ<sup>KO</sup> mice injected with NAC or vehicle (control) (n=2-3). Immunoblots for MCJ<sup>KO</sup> are the ones included in Fig. 4C of the manuscript. Statistical comparison by two-way ANOVA with Tukey's post-test (a,b,c): NS (non-significant), \*P < 0.05, \*\*P < 0.01, \*\*\*P < 0.001.

A

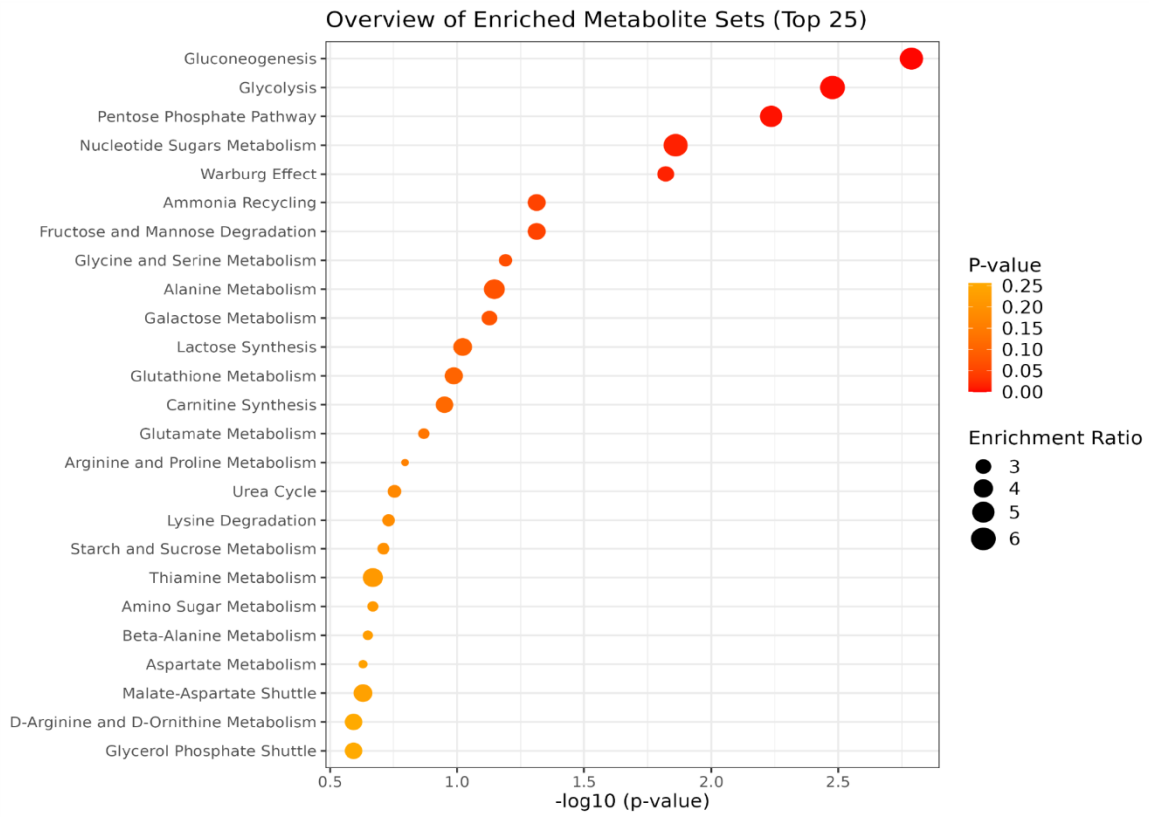

B

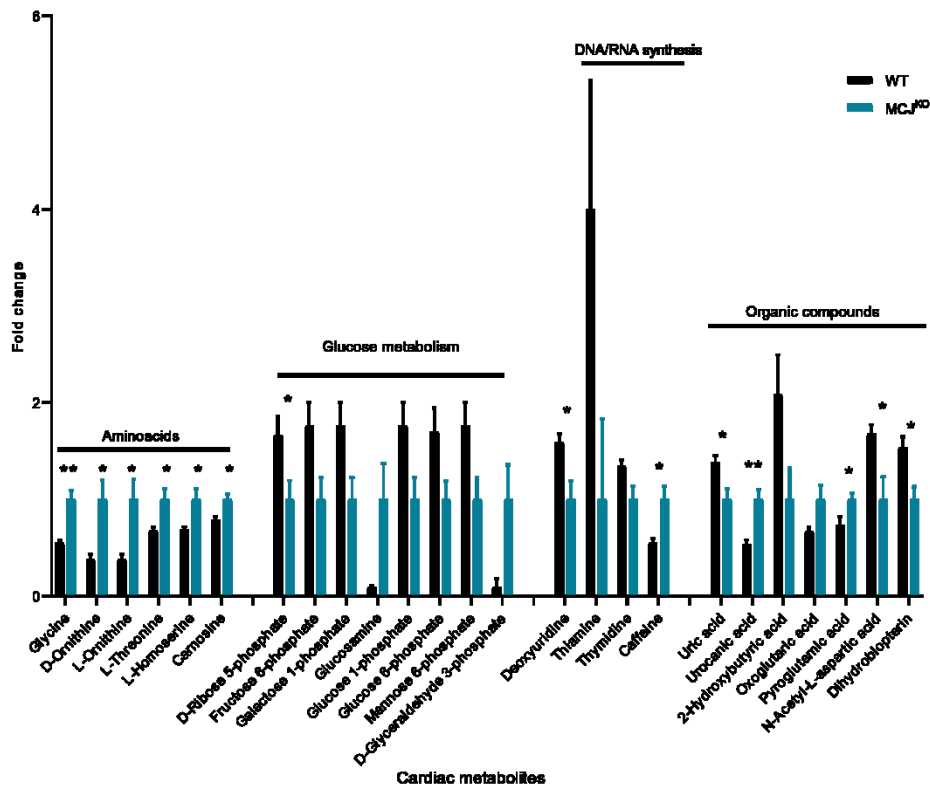

**Fig. S11. Metabolic profiling reveals hypoxic metabolite state in MCJ<sup>KO</sup> hearts.**

**(A)** Pathway enrichment analysis of differential cardiac metabolites in WT and MCJ<sup>KO</sup> mice using MetaboAnalyst 5.0. In the dot plot chart, the size of the circles per metabolite set represents the Enrichment Ratio and the color represents the p-value (n=4-5). Metabolites differentially encountered are presented in Table S1. **(B)** Relative abundance of the metabolites involved in the pathways in (A) expressed as fold change (MCJ<sup>KO</sup>= 1). Data regarding the enriched metabolites by pathway is in Table S1. All data are presented as mean  $\pm$  s.e.m. Statistical comparison by student's t-test (b): NS (nonsignificant), \*P < 0.05, \*\*P < 0.01, \*\*\*P < 0.001.

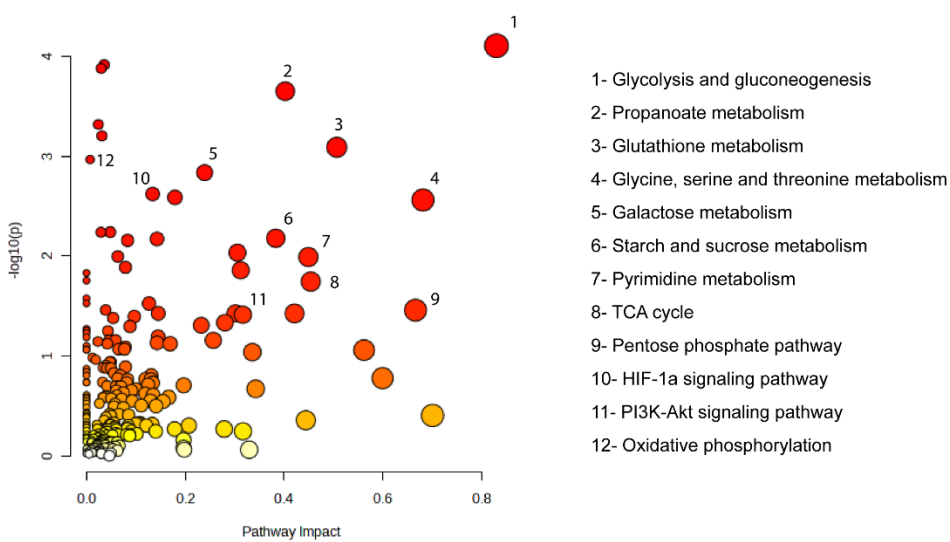

**Fig. S12. Cardiac joint pathways analysis.**

Integrative analysis of baseline cardiac metabolomics (n=4-5) and proteomics data (n=4) of WT and MCJ<sup>KO</sup> mice to identify altered pathways using MetaboAnalyst 5.0. The color and size of each circle is based on p-values and pathway impact values. Some of the main identified pathways were indicated with a number and specified on the right. Proteins and metabolites differentially encountered are presented in Table S2. Data integrated using the “all pathways integrated” database, enrichment analysis was performed using the hypergeometric test, degree centrality was used as topology measure and combine query as integration method.

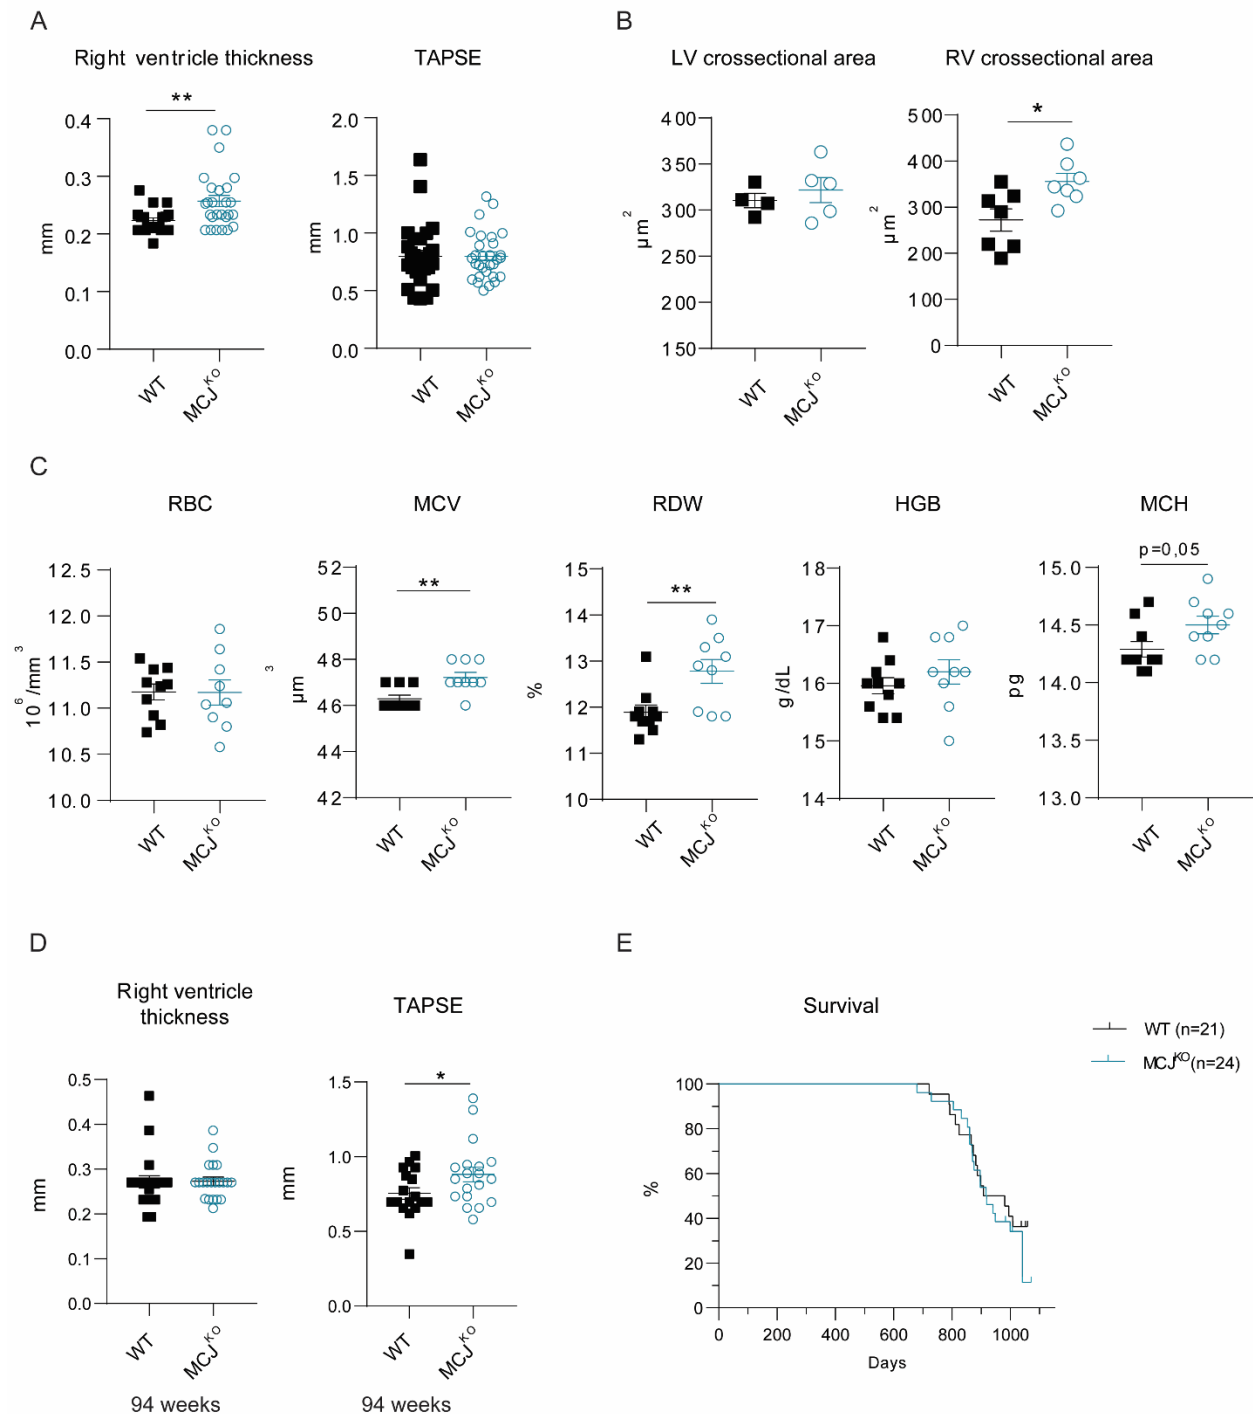

**Fig. S13. MCJ depletion leads to alterations in the hematological profile, improved RV function in aged mice and no differences in survival.**

(A) The cardiac phenotype of normoxic WT and MCJ<sup>KO</sup> mice was assessed by echocardiography by measuring the right ventricle hypertrophy (right ventricle thickness) and function (tricuspid annular plane systolic excursion, TAPSE) (n=10). (B) Cardiomyocyte crosssectional area of the

right ventricle (RV) and left ventricle (LV) in normoxic WT and MCJ<sup>KO</sup> mice measured by WGA immunostaining (n=4-7). **(C)** Hematological analyses in WT and MCJ<sup>KO</sup> mice: red blood cell (RBC), mean corpuscular volume (MCV), red cell distribution width (RDW), total hemoglobin (HGB) and mean corpuscular hemoglobin (MCH) (n=9-10). **(D)** Echocardiography assessment of right ventricle hypertrophy (right ventricle thickness) and function (tricuspid annular plane systolic excursion, TAPSE) in 94-week-old WT and MCJ<sup>KO</sup> mice (n=20-21). **(E)** Kaplan-Meier survival curves for WT and MCJ<sup>KO</sup> mice (n=21-24). All data are presented as mean  $\pm$  s.e.m. Statistical comparison by two-tailed Student t-test (a,b,c,d) or Mantel-Cox log-rank test (e): NS, \*P < 0.05, \*\*P < 0.01, \*\*\*P < 0.001.

|  | Metabolite Set                          | Total | Hits | Expect | P value | Holm P | FDR  | Enriched metabolites                                                                                            |
|--|-----------------------------------------|-------|------|--------|---------|--------|------|-----------------------------------------------------------------------------------------------------------------|
|  | <b>Gluconeogenesis</b>                  | 35    | 5    | 0.923  | 0.00163 | 0.16   | 0.16 | fructose 6-phosphate; oxoglutaric acid; D-glyceraldehyde 3-phosphate; glucose 6-phosphate; glucose 1-phosphate  |
|  | <b>Glycolysis</b>                       | 25    | 4    | 0.659  | 0.00333 | 0.323  | 0.16 | fructose 6-phosphate; D-glyceraldehyde 3-phosphate; glucose 6-phosphate; glucose 1-phosphate                    |
|  | <b>Pentose Phosphate Pathway</b>        | 29    | 4    | 0.765  | 0.00581 | 0.557  | 0.19 | fructose 6-phosphate; D-glyceraldehyde 3-phosphate; glucose 6-phosphate; D-ribose 5-phosphate                   |
|  | <b>Nucleotide Sugars Metabolism</b>     | 20    | 3    | 0.527  | 0.0138  | 1      | 0.3  | galactose 1-phosphate; glucose 6-phosphate; glucose 1-phosphate                                                 |
|  | <b>Warburg Effect</b>                   | 58    | 5    | 1.53   | 0.0151  | 1      | 0.3  | fructose 6-phosphate; oxoglutaric acid; D-glyceraldehyde 3-phosphate; glucose 6-phosphate; D-ribose 5-phosphate |
|  | <b>Ammonia Recycling</b>                | 32    | 3    | 0.844  | 0.0487  | 1      | 0.68 | glycine; oxoglutaric acid; urocanic acid                                                                        |
|  | <b>Fructose and Mannose Degradation</b> | 32    | 3    | 0.844  | 0.0487  | 1      | 0.68 | fructose 6-phosphate; mannose 6-phosphate; D-glyceraldehyde 3-phosphate;                                        |
|  | <b>Glycine and Serine Metabolism</b>    | 59    | 4    | 1.56   | 0.0645  | 1      | 0.73 | glycine; L-threonine; oxoglutaric acid; ornithine                                                               |
|  | <b>Alanine Metabolism</b>               | 17    | 2    | 0.448  | 0.0714  | 1      | 0.73 | glycine; oxoglutaric acid                                                                                       |
|  | <b>Galactose Metabolism</b>             | 38    | 3    | 1      | 0.0746  | 1      | 0.73 | galactose 1-phosphate; glucose 6-phosphate; glucose 1-phosphate                                                 |
|  | <b>Lactose Synthesis</b>                | 20    | 2    | 0.527  | 0.095   | 1      | 0.84 | galactose 1-phosphate; glucose 1-phosphate                                                                      |
|  | <b>Glutathione Metabolism</b>           | 21    | 2    | 0.554  | 0.103   | 1      | 0.84 | glycine; pyroglutamic acid;                                                                                     |
|  | <b>Carnitine Synthesis</b>              | 22    | 2    | 0.58   | 0.112   | 1      | 0.84 | glycine; oxoglutaric acid                                                                                       |
|  | <b>Glutamate Metabolism</b>             | 49    | 3    | 1.29   | 0.135   | 1      | 0.94 | glycine; fructose 6-phosphate; oxoglutaric acid                                                                 |

|                                              |    |   |       |       |   |   |                                            |
|----------------------------------------------|----|---|-------|-------|---|---|--------------------------------------------|
| <b>Arginine and Proline Metabolism</b>       | 53 | 3 | 1.4   | 0.16  | 1 | 1 | glycine; oxoglutaric acid; ornithine       |
| <b>Urea Cycle</b>                            | 29 | 2 | 0.765 | 0.176 | 1 | 1 | oxoglutaric acid; ornithine                |
| <b>Lysine Degradation</b>                    | 30 | 2 | 0.791 | 0.186 | 1 | 1 | oxoglutaric acid; aminoadipic acid         |
| <b>Starch and Sucrose Metabolism</b>         | 31 | 2 | 0.817 | 0.195 | 1 | 1 | glucose 6-phosphate; glucose 1-phosphate   |
| <b>Thiamine Metabolism</b>                   | 9  | 1 | 0.237 | 0.215 | 1 | 1 | thiamine                                   |
| <b>Amino Sugar Metabolism</b>                | 33 | 2 | 0.87  | 0.215 | 1 | 1 | fructose 6-phosphate; glucosamine          |
| <b>Beta-Alanine Metabolism</b>               | 34 | 2 | 0.896 | 0.225 | 1 | 1 | carnosine; oxoglutaric acid                |
| <b>Aspartate Metabolism</b>                  | 35 | 2 | 0.923 | 0.235 | 1 | 1 | oxoglutaric acid; N-acetyl-L-aspartic acid |
| <b>Malate-Aspartate Shuttle</b>              | 10 | 1 | 0.264 | 0.235 | 1 | 1 | oxoglutaric acid                           |
| <b>D-Arginine and D-Ornithine Metabolism</b> | 11 | 1 | 0.29  | 0.256 | 1 | 1 | D-ornithine                                |
| <b>Glycerol Phosphate Shuttle</b>            | 11 | 1 | 0.29  | 0.256 | 1 | 1 | D-glyceraldehyde 3-phosphate               |
| <b>Glucose-Alanine Cycle</b>                 | 13 | 1 | 0.343 | 0.295 | 1 | 1 | oxoglutaric acid                           |
| <b>Propanoate Metabolism</b>                 | 42 | 2 | 1.11  | 0.305 | 1 | 1 | 2-hydroxybutyric acid; oxoglutaric acid    |
| <b>Purine Metabolism</b>                     | 74 | 3 | 1.95  | 0.309 | 1 | 1 | glycine; uric acid; D-ribose 5-phosphate   |



|  |                                                 |    |   |       |       |   |   |                                             |
|--|-------------------------------------------------|----|---|-------|-------|---|---|---------------------------------------------|
|  | <b>Methionine Metabolism</b>                    | 43 | 2 | 1.13  | 0.315 | 1 | 1 | glycine; L-homoserine                       |
|  | <b>Histidine Metabolism</b>                     | 43 | 2 | 1.13  | 0.315 | 1 | 1 | carosine; urocanic acid                     |
|  | <b>Spermidine and Spermine Biosynthesis</b>     | 18 | 1 | 0.475 | 0.384 | 1 | 1 | ornithine                                   |
|  | <b>Mitochondrial Electron Transport Chain</b>   | 19 | 1 | 0.501 | 0.401 | 1 | 1 | D-glyceraldehyde 3-phosphate                |
|  | <b>Catecholamine Biosynthesis</b>               | 20 | 1 | 0.527 | 0.417 | 1 | 1 | dihydrobiopterin                            |
|  | <b>Threonine and 2-Oxobutanoate Degradation</b> | 20 | 1 | 0.527 | 0.417 | 1 | 1 | L-threonine                                 |
|  | <b>Pyrimidine Metabolism</b>                    | 59 | 2 | 1.56  | 0.468 | 1 | 1 | deoxyuridine; thymidine                     |
|  | <b>Caffeine Metabolism</b>                      | 24 | 1 | 0.633 | 0.477 | 1 | 1 | caffeine                                    |
|  | <b>Tryptophan Metabolism</b>                    | 60 | 2 | 1.58  | 0.477 | 1 | 1 | oxoglutaric acid; 3-hydroxyanthranilic acid |
|  | <b>Cysteine Metabolism</b>                      | 26 | 1 | 0.686 | 0.505 | 1 | 1 | oxoglutaric acid                            |
|  | <b>Oxidation of Branched Chain Fatty Acids</b>  | 26 | 1 | 0.686 | 0.505 | 1 | 1 | oxoglutaric acid                            |
|  | <b>Phytanic Acid Peroxisomal Oxidation</b>      | 26 | 1 | 0.686 | 0.505 | 1 | 1 | oxoglutaric acid                            |
|  | <b>Inositol Phosphate Metabolism</b>            | 26 | 1 | 0.686 | 0.505 | 1 | 1 | glucose 6-phosphate                         |
|  | <b>Phenylalanine and Tyrosine Metabolism</b>    | 28 | 1 | 0.738 | 0.532 | 1 | 1 | oxoglutaric acid                            |

|  |                                                   |    |   |       |       |   |   |                     |
|--|---------------------------------------------------|----|---|-------|-------|---|---|---------------------|
|  | <b>Pterine Biosynthesis</b>                       | 29 | 1 | 0.765 | 0.544 | 1 | 1 | dihydrobiopterin    |
|  | <b>Citric Acid Cycle</b>                          | 32 | 1 | 0.844 | 0.58  | 1 | 1 | oxoglutaric acid    |
|  | <b>Inositol Metabolism</b>                        | 33 | 1 | 0.87  | 0.592 | 1 | 1 | glucose 6-phosphate |
|  | <b>Porphyrin Metabolism</b>                       | 40 | 1 | 1.05  | 0.664 | 1 | 1 | glycine             |
|  | <b>Valine, Leucine and Isoleucine Degradation</b> | 60 | 1 | 1.58  | 0.808 | 1 | 1 | oxoglutaric acid    |
|  | <b>Bile Acid Biosynthesis</b>                     | 65 | 1 | 1.71  | 0.834 | 1 | 1 | glycine             |
|  | <b>Tyrosine Metabolism</b>                        | 72 | 1 | 1.9   | 0.864 | 1 | 1 | oxoglutaric acid    |

**Table S1.**

**Cardiac metabolomics.**

Differentially encountered metabolites ( $p < 0.05$ ) were analyzed by Metabolite Set Enrichment Analysis (MSEA) using Metaboanalyst 5.0. The table display the enriched metabolites by pathway.

| Pathways                                               | Total | Hits | Expect | Holm adjust | FDR   | Proteins and metabolites                                                                                                                                                                                                                                                                                                           |
|--------------------------------------------------------|-------|------|--------|-------------|-------|------------------------------------------------------------------------------------------------------------------------------------------------------------------------------------------------------------------------------------------------------------------------------------------------------------------------------------|
| Glycolysis or Gluconeogenesis                          | 97    | 7    | 1.037  | 0.026       | 0.014 | L-lactate dehydrogenase B, L-lactate dehydrogenase C, bisphosphoglycerate mutase, phosphoglucomutase 2, phosphoglycerate kinase 2, D-glucose 1-phosphate, glyceraldehyde 3-phosphate                                                                                                                                               |
| Central carbon metabolism in cancer                    | 104   | 7    | 1.112  | 0.040       | 0.014 | glucose 6-phosphate; 2-oxoglutarate; L-lactate dehydrogenase B; L-lactate dehydrogenase C; Akt; D-fructose 6-phosphate; glycine                                                                                                                                                                                                    |
| Alzheimer disease                                      | 180   | 9    | 1.924  | 0.043       | 0.014 | NADH:ubiquinone oxidoreductase core subunit S5; NADH:ubiquinone oxidoreductase subunit A3; NADH:ubiquinone oxidoreductase subunit B8; succinate dehydrogenase complex; ubiquinol cytochrome c reductase core protein 2; SERCA1; SERCA2; apo-E; lpl                                                                                 |
| Propanoate metabolism                                  | 81    | 6    | 0.866  | 0.073       | 0.018 | acetyl-CoA carboxylase; L-lactate dehydrogenase B; L-lactate dehydrogenase C; 2-hydroxybutyric acid; succinate-Coenzyme A ligase; dihydrolipoyl transacylase                                                                                                                                                                       |
| Glucagon signaling pathway                             | 130   | 7    | 1.390  | 0.156       | 0.032 | 2-oxoglutarate; D-fructose 6-phosphate; D-glucose 1-phosphate; Akt; acetyl-CoA carboxylase; L-lactate dehydrogenase B; L-lactate dehydrogenase C                                                                                                                                                                                   |
| Prion diseases                                         | 37    | 4    | 0.396  | 0.202       | 0.034 | laminin; tyrosine-protein kinase Fyn; complement component 7; complement component 5                                                                                                                                                                                                                                               |
| Glutathione metabolism                                 | 103   | 6    | 1.101  | 0.261       | 0.038 | glutathione peroxidase 4; glutathione S-transferase; pyroglutamic acid; glycine; glutathione reductase; ornithine                                                                                                                                                                                                                  |
| Oxidative phosphorylation                              | 149   | 7    | 1.593  | 0.346       | 0.044 | NADH:ubiquinone oxidoreductase subunit B8; NADH:ubiquinone oxidoreductase subunit A3; NADH:ubiquinone oxidoreductase core subunit S5; cytochrome c oxidase assembly protein 15; ubiquinol cytochrome c reductase core protein 2; ATP synthase membrane subunit f; succinate dehydrogenase complex                                  |
| Galactose metabolism                                   | 78    | 5    | 0.834  | 0.466       | 0.053 | phosphoglucomutase 2; D-glucose 1-phosphate; alpha-D-galactose 1-phosphate; glyceraldehyde 3-phosphate; D-Fructose 6-phosphate                                                                                                                                                                                                     |
| HIF-1 signaling pathway                                | 127   | 6    | 1.358  | 0.761       | 0.075 | Akt; L-lactate dehydrogenase B; L-lactate dehydrogenase C; phosphoglycerate kinase 2; 2-oxoglutarate; eIF-4E                                                                                                                                                                                                                       |
| Thyroid hormone signaling pathway                      | 129   | 6    | 1.379  | 0.820       | 0.075 | Akt; phospholipase C; SERCA1; SERCA2; phospholamban; Notch2                                                                                                                                                                                                                                                                        |
| Glycine, serine and threonine metabolism               | 90    | 5    | 0.962  | 0.869       | 0.075 | threonine aldolase 1; glycine; L-threonine; L-homoserine; bisphosphoglycerate mutase                                                                                                                                                                                                                                               |
| Thermogenesis                                          | 253   | 8    | 2.705  | 1           | 0.134 | cGMP-dependent protein kinase 1; cytochrome c oxidase assembly protein 15; NADH:ubiquinone oxidoreductase core subunit S5; NADH:ubiquinone oxidoreductase subunit A3; succinate dehydrogenase complex; ubiquinol cytochrome c reductase core protein 2; NADH:ubiquinone oxidoreductase subunit B8; ATP synthase membrane subunit f |
| Non-alcoholic fatty liver disease (NAFLD)              | 152   | 6    | 1.625  | 1           | 0.134 | Akt; NADH:ubiquinone oxidoreductase core subunit S5; NADH:ubiquinone oxidoreductase subunit A3; NADH:ubiquinone oxidoreductase subunit B8; succinate dehydrogenase complex; ubiquinol cytochrome c reductase core protein 2                                                                                                        |
| Starch and sucrose metabolism                          | 70    | 4    | 0.748  | 1           | 0.134 | glucose 6-phosphate; phosphoglucomutase 2; D-fructose 6-phosphate; D-glucose 1-phosphate                                                                                                                                                                                                                                           |
| Amino sugar and nucleotide sugar metabolism            | 157   | 6    | 1.678  | 1           | 0.134 | D-glucosamine; phosphoglucomutase 2; alpha-D-galactose 1-phosphate; D-glucose 1-phosphate; D-mannose 6-phosphate; D-xylose                                                                                                                                                                                                         |
| D-Arginine and D-ornithine metabolism                  | 12    | 2    | 0.128  | 1           | 0.134 | ornithine; D-ornithine                                                                                                                                                                                                                                                                                                             |
| Inositol phosphate metabolism                          | 120   | 5    | 1.283  | 1           | 0.167 | myo-inositol-1-phosphate synthase; phospholipase C; glucose 6-phosphate; glyceraldehyde 3-phosphate; phosphatidylinositol 4-phosphatase                                                                                                                                                                                            |
| Arrhythmogenic right ventricular cardiomyopathy (ARVC) | 79    | 4    | 0.845  | 1           | 0.167 | SERCA1; SERCA2; desmoglein 2; desmoplakin                                                                                                                                                                                                                                                                                          |

|                                               |     |   |       |   |       |                                                                                                                                                                                                                        |
|-----------------------------------------------|-----|---|-------|---|-------|------------------------------------------------------------------------------------------------------------------------------------------------------------------------------------------------------------------------|
| <b>Pyrimidine metabolism</b>                  | 123 | 5 | 1.315 | 1 | 0.167 | nucleoside diphosphate kinase 1; L-dihydroorotate; thymidine; malonate; deoxyuridine                                                                                                                                   |
| <b>Thiamine metabolism</b>                    | 46  | 3 | 0.492 | 1 | 0.202 | glyceraldehyde 3-phosphate; thiamine; glycine                                                                                                                                                                          |
| <b>D-Glutamine and D-glutamate metabolism</b> | 17  | 2 | 0.182 | 1 | 0.206 | D-glutamate cyclase; 2-oxoglutarate                                                                                                                                                                                    |
| <b>ABC transporters</b>                       | 186 | 6 | 1.988 | 1 | 0.210 | D-xylose; ornithine; L-threonine; thiamine; glycine; deoxyuridine                                                                                                                                                      |
| <b>Protein digestion and absorption</b>       | 141 | 5 | 1.507 | 1 | 0.236 | glycine; L-Threonine; collagen type XVIII; collagen type VI alpha; collagen type XXIV                                                                                                                                  |
| <b>Citrate cycle (TCA cycle)</b>              | 52  | 3 | 0.556 | 1 | 0.236 | succinate-Coenzyme A ligase; 2-oxoglutarate; succinate dehydrogenase complex                                                                                                                                           |
| <b>Parkinson disease</b>                      | 157 | 5 | 1.678 | 1 | 0.334 | NADH:ubiquinone oxidoreductase core subunit S5; NADH:ubiquinone oxidoreductase subunit A3; NADH:ubiquinone oxidoreductase subunit B8; succinate dehydrogenase complex; ubiquinol cytochrome c reductase core protein 2 |
| <b>Phosphonate and phosphinate metabolism</b> | 63  | 3 | 0.673 | 1 | 0.349 | phosphonoacetic acid; ribose 5-phosphate; glycine                                                                                                                                                                      |
| <b>Adrenergic signaling in cardiomyocytes</b> | 162 | 5 | 1.732 | 1 | 0.349 | SERCA1; SERCA2; Akt; phospholamban; protein phosphatase 2                                                                                                                                                              |
| <b>Lysine degradation</b>                     | 115 | 4 | 1.229 | 1 | 0.372 | glutaric acid; L-2-aminoadipic acid; glycine; 2-oxoglutarate                                                                                                                                                           |
| <b>Pentose phosphate pathway</b>              | 67  | 3 | 0.716 | 1 | 0.372 | phosphoglucomutase 2; glyceraldehyde 3-phosphate; ribose 5-phosphate                                                                                                                                                   |
| <b>Butanoate metabolism</b>                   | 69  | 3 | 0.738 | 1 | 0.372 | 3-hydroxybutyrate dehydrogenase; maleate; 2-oxoglutarate                                                                                                                                                               |
| <b>Pyruvate metabolism</b>                    | 69  | 3 | 0.738 | 1 | 0.372 | L-lactate dehydrogenase B; L-lactate dehydrogenase C; acetyl-CoA carboxylase                                                                                                                                           |
| <b>Purine metabolism</b>                      | 231 | 6 | 2.470 | 1 | 0.372 | nucleoside diphosphate kinase 1; guanine deaminase; phosphoglucomutase 2; ribose 5-phosphate; uric acid; glycine                                                                                                       |
| <b>PI3K-Akt signaling pathway</b>             | 359 | 8 | 3.838 | 1 | 0.372 | eIF-4E; Akt; 14-3-3 protein epsilon ; thioesterase superfamily member 4; protein phosphatase 2 ; laminin B1; laminin; collagen type VI alpha                                                                           |
| <b>Histidine metabolism</b>                   | 71  | 3 | 0.759 | 1 | 0.377 | carnosine; urocanate; 2-oxoglutarate                                                                                                                                                                                   |
| <b>Ferroptosis</b>                            | 72  | 3 | 0.770 | 1 | 0.379 | glutathione peroxidase 4; ferritin heavy chain ; lysophosphatidylcholine acyltransferase 3                                                                                                                             |
| <b>cGMP-PKG signaling pathway</b>             | 183 | 5 | 1.956 | 1 | 0.411 | cGMP-dependent protein kinase 1; SERCA1; SERCA2; phospholamban; Akt                                                                                                                                                    |
| <b>Fatty acid biosynthesis</b>                | 77  | 3 | 0.823 | 1 | 0.424 | acetyl-CoA carboxylase ; malonate; 7 beta-estradiol 17-dehydrogenase                                                                                                                                                   |
| <b>Insulin resistance</b>                     | 130 | 4 | 1.390 | 1 | 0.425 | Akt; acetyl-CoA carboxylase; glucose 6-phosphate; D-fructose 6-phosphate                                                                                                                                               |
| <b>Collecting duct acid secretion</b>         | 35  | 2 | 0.374 | 1 | 0.439 | solute carrier family 4 ; carbonic anhydrase 2                                                                                                                                                                         |

|                                            |     |   |       |   |       |                                                                                                                                                                                                                        |
|--------------------------------------------|-----|---|-------|---|-------|------------------------------------------------------------------------------------------------------------------------------------------------------------------------------------------------------------------------|
| Mineral absorption                         | 81  | 3 | 0.866 | 1 | 0.439 | ferritin heavy chain; glycine; L-threonine                                                                                                                                                                             |
| Nitrogen metabolism                        | 36  | 2 | 0.385 | 1 | 0.439 | carbonic anhydrase 1; carbonic anhydrase 2                                                                                                                                                                             |
| Huntington disease                         | 196 | 5 | 2.095 | 1 | 0.450 | NADH:ubiquinone oxidoreductase core subunit S5; NADH:ubiquinone oxidoreductase subunit A3; NADH:ubiquinone oxidoreductase subunit B8; succinate dehydrogenase complex; ubiquinol cytochrome c reductase core protein 2 |
| Focal adhesion                             | 201 | 5 | 2.149 | 1 | 0.472 | Akt; tyrosine-protein kinase Fyn; laminin B1; laminin; collagen type VI alpha                                                                                                                                          |
| Proximal tubule bicarbonate reclamation    | 39  | 2 | 0.417 | 1 | 0.472 | carbonic anhydrase 2; 2-oxoglutarate                                                                                                                                                                                   |
| Complement and coagulation cascades        | 89  | 3 | 0.951 | 1 | 0.475 | serine (or cysteine) peptidase inhibitor; complement component 5; complement component 7                                                                                                                               |
| Pentose and glucuronate interconversions   | 89  | 3 | 0.951 | 1 | 0.475 | D-glucose 1-phosphate; D-xylose; 2-oxoglutarate                                                                                                                                                                        |
| ECM-receptor interaction                   | 89  | 3 | 0.951 | 1 | 0.475 | laminin B1; laminin; collagen type VI alpha                                                                                                                                                                            |
| Cardiac muscle contraction                 | 90  | 3 | 0.962 | 1 | 0.475 | SERCA1; SERCA2; ubiquinol cytochrome c reductase core protein 2                                                                                                                                                        |
| Arginine biosynthesis                      | 42  | 2 | 0.449 | 1 | 0.475 | ornithine; 2-oxoglutarate                                                                                                                                                                                              |
| AMPK signaling pathway                     | 149 | 4 | 1.593 | 1 | 0.475 | Akt; D-fructose 6-phosphate; acetyl-CoA carboxylase ; protein phosphatase 2                                                                                                                                            |
| PPAR signaling pathway                     | 92  | 3 | 0.984 | 1 | 0.475 | perilipin-2 ; acyl-CoA dehydrogenase; Lpl                                                                                                                                                                              |
| Thyroid hormone synthesis                  | 94  | 3 | 1.005 | 1 | 0.485 | glucose 6-phosphate; ribose 5-phosphate; glutathione reductase                                                                                                                                                         |
| Small cell lung cancer                     | 95  | 3 | 1.016 | 1 | 0.485 | Akt; laminin B1; laminin                                                                                                                                                                                               |
| Dilated cardiomyopathy (DCM)               | 97  | 3 | 1.037 | 1 | 0.485 | SERCA1; SERCA2; phospholamban                                                                                                                                                                                          |
| Gap junction                               | 97  | 3 | 1.037 | 1 | 0.485 | cGMP-dependent protein kinase 1; tubulin beta 2; tubulin beta 4                                                                                                                                                        |
| Proteasome                                 | 46  | 2 | 0.492 | 1 | 0.485 | proteasome activator subunit 1; 20S proteasome subunit alpha 6                                                                                                                                                         |
| African trypanosomiasis                    | 46  | 2 | 0.492 | 1 | 0.485 | hemoglobin subunit beta; hemoglobin subunit alpha                                                                                                                                                                      |
| Valine, leucine and isoleucine degradation | 98  | 3 | 1.048 | 1 | 0.485 | acyl-Coenzyme A dehydrogenase; dihydrolipoyl transacylase; acyl-CoA dehydrogenase                                                                                                                                      |
| Fatty acid degradation                     | 100 | 3 | 1.069 | 1 | 0.500 | acyl-Coenzyme A dehydrogenase; acyl-CoA dehydrogenase; glutaric acid                                                                                                                                                   |
| Retrograde endocannabinoid signaling       | 167 | 4 | 1.785 | 1 | 0.557 | solute carrier family 32 ; NADH:ubiquinone oxidoreductase core subunit S5; NADH:ubiquinone oxidoreductase subunit A3; NADH:ubiquinone oxidoreductase subunit B8                                                        |

|                                             |     |   |       |   |       |                                                                                                                                   |
|---------------------------------------------|-----|---|-------|---|-------|-----------------------------------------------------------------------------------------------------------------------------------|
| Protein processing in endoplasmic reticulum | 170 | 4 | 1.817 | 1 | 0.575 | protein kinase C substrate 80K-H ; translocation protein SEC63;DnaJ homolog subfamily A member 1; protein transport protein SEC31 |
| cAMP signaling pathway                      | 240 | 5 | 2.566 | 1 | 0.592 | SERCA1; SERCA2; Akt; phospholamban; phospholipase C                                                                               |
| Toxoplasmosis                               | 111 | 3 | 1.187 | 1 | 0.592 | Akt; laminin B1; laminin                                                                                                          |
| Cysteine and methionine metabolism          | 115 | 3 | 1.229 | 1 | 0.629 | L-lactate dehydrogenase B; L-lactate dehydrogenase C; L-homoserine                                                                |
| Phagosome                                   | 181 | 4 | 1.935 | 1 | 0.629 | rab-interacting lysosomal protein; tubulin beta; tubulin beta 4; lysosomal-associated membrane protein 2                          |
| Cholesterol metabolism                      | 59  | 2 | 0.631 | 1 | 0.629 | apo-E; lpl                                                                                                                        |
| Aminoacyl-tRNA biosynthesis                 | 118 | 3 | 1.262 | 1 | 0.629 | isoleucyl-tRNA synthetase 1; L-threonine; glycine                                                                                 |
| Porphyrin and chlorophyll metabolism        | 183 | 4 | 1.956 | 1 | 0.629 | glycine; biliverdin reductase B; cytochrome c oxidase assembly protein 15; L-threonine                                            |
| Malaria                                     | 60  | 2 | 0.641 | 1 | 0.629 | hemoglobin subunit beta; hemoglobin subunit alpha                                                                                 |
| Pancreatic secretion                        | 123 | 3 | 1.315 | 1 | 0.666 | carbonic anhydrase 2; SERCA1; SERCA2                                                                                              |
| beta-Alanine metabolism                     | 64  | 2 | 0.684 | 1 | 0.679 | malonate; carnosine                                                                                                               |
| Alanine, aspartate and glutamate metabolism | 66  | 2 | 0.706 | 1 | 0.686 | 2-oxoglutarate; N-acetyl-L-aspartate                                                                                              |
| Lysosome                                    | 128 | 3 | 1.368 | 1 | 0.686 | palmitoyl-protein thioesterase 1; lysosomal-associated membrane protein 2; D-mannose 6-phosphate                                  |
| Arginine and proline metabolism             | 128 | 3 | 1.368 | 1 | 0.686 | creatine kinase; ornithine; 4-guanidinobutanoate                                                                                  |
| Synthesis and degradation of ketone bodies  | 17  | 1 | 0.182 | 1 | 0.703 | 3-hydroxybutyrate dehydrogenase                                                                                                   |
| Fatty acid elongation                       | 69  | 2 | 0.738 | 1 | 0.703 | palmitoyl-protein thioesterase 1; thioesterase superfamily member 4                                                               |
| Calcium signaling pathway                   | 202 | 4 | 2.159 | 1 | 0.703 | phospholipase C; SERCA1; SERCA2; phospholamban                                                                                    |
| Regulation of lipolysis in adipocytes       | 70  | 2 | 0.748 | 1 | 0.703 | cGMP-dependent protein kinase 1; Akt                                                                                              |
| Long-term depression                        | 70  | 2 | 0.748 | 1 | 0.703 | cGMP-dependent protein kinase 1; protein phosphatase 2                                                                            |
| Bacterial invasion of epithelial cells      | 73  | 2 | 0.780 | 1 | 0.716 | septin 8; septin 11                                                                                                               |
| Carbohydrate digestion and absorption       | 73  | 2 | 0.780 | 1 | 0.716 | glucose 6-phosphate; Akt                                                                                                          |

|                                             |     |   |       |   |       |                                                                                 |
|---------------------------------------------|-----|---|-------|---|-------|---------------------------------------------------------------------------------|
| Sulfur relay system                         | 19  | 1 | 0.203 | 1 | 0.716 | thiamine                                                                        |
| Platelet activation                         | 139 | 3 | 1.486 | 1 | 0.716 | Akt; cGMP-dependent protein kinase 1; tyrosine-protein kinase Fyn               |
| Sphingolipid signaling pathway              | 139 | 3 | 1.486 | 1 | 0.716 | Akt; protein phosphatase 2 ; tyrosine-protein kinase Fyn                        |
| Human papillomavirus infection              | 364 | 6 | 3.891 | 1 | 0.737 | Akt; laminin B1; laminin; collagen type VI alpha; Notch2; protein phosphatase 2 |
| Insulin signaling pathway                   | 143 | 3 | 1.529 | 1 | 0.737 | acetyl-CoA carboxylase ; eIF-4E; Akt                                            |
| Autophagy - animal                          | 144 | 3 | 1.539 | 1 | 0.737 | Akt; protein phosphatase 2 ; lysosomal-associated membrane protein 2            |
| Fc epsilon RI signaling pathway             | 78  | 2 | 0.834 | 1 | 0.737 | tyrosine-protein kinase Fyn; Akt                                                |
| Adipocytokine signaling pathway             | 78  | 2 | 0.834 | 1 | 0.737 | acetyl-CoA carboxylase ; Akt                                                    |
| Glycerophospholipid metabolism              | 149 | 3 | 1.593 | 1 | 0.763 | diethanolamine; lysophosphatidylcholine acyltransferase 3; phospholipase A2     |
| Platinum drug resistance                    | 81  | 2 | 0.866 | 1 | 0.763 | glutathione S-transferase; Akt                                                  |
| Prolactin signaling pathway                 | 83  | 2 | 0.887 | 1 | 0.774 | Akt; glucose 6-phosphate                                                        |
| EGFR tyrosine kinase inhibitor resistance   | 83  | 2 | 0.887 | 1 | 0.774 | Akt; eIF-4E                                                                     |
| Pertussis                                   | 86  | 2 | 0.919 | 1 | 0.807 | serine (or cysteine) peptidase inhibitor; complement component 5                |
| mTOR signaling pathway                      | 158 | 3 | 1.689 | 1 | 0.814 | Akt; eIF-4E; MAPK and MTOR activator 2                                          |
| Synaptic vesicle cycle                      | 89  | 2 | 0.951 | 1 | 0.821 | glycine; solute carrier family 32                                               |
| Fructose and mannose metabolism             | 89  | 2 | 0.951 | 1 | 0.821 | D-mannose 6-phosphate; glyceraldehyde 3-phosphate                               |
| Hepatitis C                                 | 162 | 3 | 1.732 | 1 | 0.821 | protein phosphatase 2 ; Akt; 14-3-3 protein epsilon                             |
| Valine, leucine and isoleucine biosynthesis | 27  | 1 | 0.289 | 1 | 0.821 | L-threonine                                                                     |
| Protein export                              | 28  | 1 | 0.299 | 1 | 0.821 | translocation protein SEC63                                                     |
| Caffeine metabolism                         | 28  | 1 | 0.299 | 1 | 0.821 | caffeine                                                                        |
| Riboflavin metabolism                       | 28  | 1 | 0.299 | 1 | 0.821 | biliverdin reductase B                                                          |

|                                                      |     |   |       |   |       |                                                  |
|------------------------------------------------------|-----|---|-------|---|-------|--------------------------------------------------|
| Glyoxylate and dicarboxylate metabolism              | 93  | 2 | 0.994 | 1 | 0.821 | 2-oxoglutarate; glycine                          |
| Hypertrophic cardiomyopathy (HCM)                    | 94  | 2 | 1.005 | 1 | 0.821 | SERCA1; SERCA2                                   |
| Progesterone-mediated oocyte maturation              | 94  | 2 | 1.005 | 1 | 0.821 | Akt; serine/threonine kinase 10                  |
| mRNA surveillance pathway                            | 95  | 2 | 1.016 | 1 | 0.825 | protein phosphatase 2 ; DAZ associated protein 1 |
| GABAergic synapse                                    | 98  | 2 | 1.048 | 1 | 0.838 | solute carrier family 32; 2-oxoglutarate         |
| Fc gamma R-mediated phagocytosis                     | 98  | 2 | 1.048 | 1 | 0.838 | Akt; phospholipase A2                            |
| Longevity regulating pathway                         | 98  | 2 | 1.048 | 1 | 0.838 | Akt; eIF-4E                                      |
| Glycerolipid metabolism                              | 99  | 2 | 1.058 | 1 | 0.842 | Lpl; D-glucose 1-phosphate                       |
| Taurine and hypotaurine metabolism                   | 33  | 1 | 0.353 | 1 | 0.865 | 2-oxoglutarate                                   |
| SNARE interactions in vesicular transport            | 33  | 1 | 0.353 | 1 | 0.865 | syntaxin 8                                       |
| Endocrine resistance                                 | 103 | 2 | 1.101 | 1 | 0.865 | Akt; notch2                                      |
| Autophagy - other                                    | 35  | 1 | 0.374 | 1 | 0.893 | protein phosphatase 2                            |
| T cell receptor signaling pathway                    | 107 | 2 | 1.144 | 1 | 0.895 | Akt; tyrosine-protein kinase Fyn                 |
| Chagas disease (American trypanosomiasis)            | 108 | 2 | 1.155 | 1 | 0.898 | Akt; protein phosphatase 2                       |
| Vitamin B6 metabolism                                | 37  | 1 | 0.396 | 1 | 0.905 | glyceraldehyde 3-phosphate                       |
| AGE-RAGE signaling pathway in diabetic complications | 110 | 2 | 1.176 | 1 | 0.905 | Akt; phospholipase C                             |
| Amoebiasis                                           | 120 | 2 | 1.283 | 1 | 1     | laminin B1; laminin                              |
| Sulfur metabolism                                    | 44  | 1 | 0.470 | 1 | 1     | L-homoserine                                     |
| Oocyte meiosis                                       | 123 | 2 | 1.315 | 1 | 1     | 14-3-3 protein epsilon ; protein phosphatase 2   |
| Cholinergic synapse                                  | 124 | 2 | 1.326 | 1 | 1     | Akt; tyrosine-protein kinase Fyn                 |
| Neurotrophin signaling pathway                       | 126 | 2 | 1.347 | 1 | 1     | Akt; 14-3-3 protein epsilon                      |



|                                                 |     |   |       |   |   |                                                                              |
|-------------------------------------------------|-----|---|-------|---|---|------------------------------------------------------------------------------|
| Phosphatidylinositol signaling system           | 127 | 2 | 1.358 | 1 | 1 | phospholipase C; phosphatidylinositol 4-phosphatase                          |
| Proteoglycans in cancer                         | 212 | 3 | 2.266 | 1 | 1 | ankyrin; Akt; phospholipase C                                                |
| Nicotine addiction                              | 47  | 1 | 0.502 | 1 | 1 | solute carrier family 32                                                     |
| Osteoclast differentiation                      | 131 | 2 | 1.400 | 1 | 1 | tyrosine-protein kinase Fyn; Akt                                             |
| Spliceosome                                     | 132 | 2 | 1.411 | 1 | 1 | splicing factor 3A subunit 3 ; heterogeneous nuclear ribonucleoprotein C1/C2 |
| Notch signaling pathway                         | 54  | 1 | 0.577 | 1 | 1 | nNotch2                                                                      |
| Apoptosis                                       | 140 | 2 | 1.497 | 1 | 1 | Akt; spectrin alpha chain                                                    |
| Systemic lupus erythematosus                    | 145 | 2 | 1.550 | 1 | 1 | complement component 5; complement component 7                               |
| Dopaminergic synapse                            | 146 | 2 | 1.561 | 1 | 1 | Akt; protein phosphatase 2                                                   |
| Endometrial cancer                              | 59  | 1 | 0.631 | 1 | 1 | Akt                                                                          |
| Ras signaling pathway                           | 239 | 3 | 2.555 | 1 | 1 | Akt; phospholipase C; phospholipase A2                                       |
| Breast cancer                                   | 150 | 2 | 1.604 | 1 | 1 | notch2; Akt                                                                  |
| Drug metabolism - other enzymes                 | 151 | 2 | 1.614 | 1 | 1 | nucleoside diphosphate kinase 1; glutathione S-transferase                   |
| Fluid shear stress and atherosclerosis          | 152 | 2 | 1.625 | 1 | 1 | Akt; glutathione S-transferase                                               |
| Bile secretion                                  | 246 | 3 | 2.630 | 1 | 1 | carbonic anhydrase 2; uric acid; 2-oxoglutarate                              |
| Hippo signaling pathway                         | 154 | 2 | 1.646 | 1 | 1 | 14-3-3 protein epsilon ; protein phosphatase 2                               |
| Vitamin digestion and absorption                | 63  | 1 | 0.673 | 1 | 1 | thiamine                                                                     |
| Primary bile acid biosynthesis                  | 63  | 1 | 0.673 | 1 | 1 | glycine                                                                      |
| VEGF signaling pathway                          | 64  | 1 | 0.684 | 1 | 1 | Akt                                                                          |
| Longevity regulating pathway - multiple species | 64  | 1 | 0.684 | 1 | 1 | Akt                                                                          |
| Vascular smooth muscle contraction              | 156 | 2 | 1.668 | 1 | 1 | phospholipase A2; cGMP-dependent protein kinase 1                            |

|                                                 |     |   |       |   |   |                                                       |
|-------------------------------------------------|-----|---|-------|---|---|-------------------------------------------------------|
| Phospholipase D signaling pathway               | 159 | 2 | 1.700 | 1 | 1 | Akt; tyrosine-protein kinase Fyn                      |
| Terpenoid backbone biosynthesis                 | 68  | 1 | 0.727 | 1 | 1 | glyceraldehyde 3-phosphate                            |
| alpha-Linolenic acid metabolism                 | 69  | 1 | 0.738 | 1 | 1 | phospholipase A2                                      |
| JAK-STAT signaling pathway                      | 165 | 2 | 1.764 | 1 | 1 | Akt; interleukin 19                                   |
| Renal cell carcinoma                            | 71  | 1 | 0.759 | 1 | 1 | Akt                                                   |
| Adherens junction                               | 71  | 1 | 0.759 | 1 | 1 | tyrosine-protein kinase Fyn                           |
| Acute myeloid leukemia                          | 71  | 1 | 0.759 | 1 | 1 | Akt                                                   |
| Tight junction                                  | 167 | 2 | 1.785 | 1 | 1 | protein phosphatase 2 ; myosin heavy chain 9/10/11/14 |
| GnRH secretion                                  | 72  | 1 | 0.770 | 1 | 1 | Akt                                                   |
| Non-small cell lung cancer                      | 72  | 1 | 0.770 | 1 | 1 | Akt                                                   |
| Ether lipid metabolism                          | 72  | 1 | 0.770 | 1 | 1 | phospholipase A2                                      |
| Melanoma                                        | 73  | 1 | 0.780 | 1 | 1 | Akt                                                   |
| Ascorbate and aldarate metabolism               | 76  | 1 | 0.812 | 1 | 1 | 2-oxoglutarate                                        |
| Chronic myeloid leukemia                        | 77  | 1 | 0.823 | 1 | 1 | Akt                                                   |
| Glioma                                          | 78  | 1 | 0.834 | 1 | 1 | Akt                                                   |
| Pancreatic cancer                               | 78  | 1 | 0.834 | 1 | 1 | Akt                                                   |
| Linoleic acid metabolism                        | 78  | 1 | 0.834 | 1 | 1 | phospholipase A2                                      |
| Salmonella infection                            | 79  | 1 | 0.845 | 1 | 1 | rab-interacting lysosomal protein                     |
| Folate biosynthesis                             | 83  | 1 | 0.887 | 1 | 1 | 7,8-dihydrobiopterin                                  |
| Hepatocellular carcinoma                        | 186 | 2 | 1.988 | 1 | 1 | Akt; glutathione S-transferase                        |
| Neomycin, kanamycin and gentamicin biosynthesis | 86  | 1 | 0.919 | 1 | 1 | glucose 6-phosphate                                   |

|                                                                      |     |   |       |   |   |                                              |
|----------------------------------------------------------------------|-----|---|-------|---|---|----------------------------------------------|
| <b>B cell receptor signaling pathway</b>                             | 86  | 1 | 0.919 | 1 | 1 | Akt                                          |
| <b>Gastric acid secretion</b>                                        | 88  | 1 | 0.941 | 1 | 1 | carbonic anhydrase 2                         |
| <b>Viral myocarditis</b>                                             | 88  | 1 | 0.941 | 1 | 1 | tyrosine-protein kinase Fyn                  |
| <b>ErbB signaling pathway</b>                                        | 88  | 1 | 0.941 | 1 | 1 | Akt                                          |
| <b>Colorectal cancer</b>                                             | 89  | 1 | 0.951 | 1 | 1 | Akt                                          |
| <b>Tuberculosis</b>                                                  | 195 | 2 | 2.085 | 1 | 1 | lysosomal-associated membrane protein 2; Akt |
| <b>Th1 and Th2 cell differentiation</b>                              | 90  | 1 | 0.962 | 1 | 1 | notch2                                       |
| <b>Antigen processing and presentation</b>                           | 91  | 1 | 0.973 | 1 | 1 | proteasome activator subunit 1               |
| <b>PD-L1 expression and PD-1 checkpoint pathway in cancer</b>        | 92  | 1 | 0.984 | 1 | 1 | Akt                                          |
| <b>TGF-beta signaling pathway</b>                                    | 95  | 1 | 1.016 | 1 | 1 | protein phosphatase 2                        |
| <b>Salivary secretion</b>                                            | 95  | 1 | 1.016 | 1 | 1 | cGMP-dependent protein kinase 1              |
| <b>Nicotinate and nicotinamide metabolism</b>                        | 98  | 1 | 1.048 | 1 | 1 | maleate                                      |
| <b>Insulin secretion</b>                                             | 98  | 1 | 1.048 | 1 | 1 | glucose 6-phosphate                          |
| <b>Toll-like receptor signaling pathway</b>                          | 99  | 1 | 1.058 | 1 | 1 | Akt                                          |
| <b>Morphine addiction</b>                                            | 103 | 1 | 1.101 | 1 | 1 | solute carrier family 32                     |
| <b>Viral protein interaction with cytokine and cytokine receptor</b> | 103 | 1 | 1.101 | 1 | 1 | interleukin 19                               |
| <b>Rap1 signaling pathway</b>                                        | 219 | 2 | 2.341 | 1 | 1 | Akt; phospholipase C                         |
| <b>Circadian entrainment</b>                                         | 107 | 1 | 1.144 | 1 | 1 | cGMP-dependent protein kinase 1              |
| <b>Choline metabolism in cancer</b>                                  | 109 | 1 | 1.165 | 1 | 1 | Akt                                          |
| <b>Prostate cancer</b>                                               | 110 | 1 | 1.176 | 1 | 1 | Akt                                          |
| <b>TNF signaling pathway</b>                                         | 113 | 1 | 1.208 | 1 | 1 | Akt                                          |

|                                                          |     |   |       |   |   |                                                                             |
|----------------------------------------------------------|-----|---|-------|---|---|-----------------------------------------------------------------------------|
| Ribosome biogenesis in eukaryotes                        | 116 | 1 | 1.240 | 1 | 1 | <a href="#">ribosome maturation protein SDO1</a>                            |
| Tyrosine metabolism                                      | 118 | 1 | 1.262 | 1 | 1 | <a href="#">maleate</a>                                                     |
| Growth hormone synthesis, secretion and action           | 120 | 1 | 1.283 | 1 | 1 | <a href="#">Akt</a>                                                         |
| Natural killer cell mediated cytotoxicity                | 121 | 1 | 1.294 | 1 | 1 | <a href="#">tyrosine-protein kinase Fyn</a>                                 |
| Cell cycle                                               | 123 | 1 | 1.315 | 1 | 1 | <a href="#">14-3-3 protein epsilon</a>                                      |
| Staphylococcus aureus infection                          | 123 | 1 | 1.315 | 1 | 1 | <a href="#">complement component 5</a>                                      |
| Pathways in cancer                                       | 570 | 5 | 6.094 | 1 | 1 | <a href="#">laminin B1; laminin; Akt; notch2; glutathione S-transferase</a> |
| C-type lectin receptor signaling pathway                 | 124 | 1 | 1.326 | 1 | 1 | <a href="#">Akt</a>                                                         |
| Yersinia infection                                       | 126 | 1 | 1.347 | 1 | 1 | <a href="#">Akt</a>                                                         |
| Tryptophan metabolism                                    | 130 | 1 | 1.390 | 1 | 1 | <a href="#">3-hydroxyanthranilate</a>                                       |
| Relaxin signaling pathway                                | 135 | 1 | 1.443 | 1 | 1 | <a href="#">Akt</a>                                                         |
| FoxO signaling pathway                                   | 136 | 1 | 1.454 | 1 | 1 | <a href="#">Akt</a>                                                         |
| Signaling pathways regulating pluripotency of stem cells | 138 | 1 | 1.475 | 1 | 1 | <a href="#">Akt</a>                                                         |
| Estrogen signaling pathway                               | 142 | 1 | 1.518 | 1 | 1 | <a href="#">Akt</a>                                                         |
| Measles                                                  | 145 | 1 | 1.550 | 1 | 1 | <a href="#">Akt</a>                                                         |
| Apelin signaling pathway                                 | 146 | 1 | 1.561 | 1 | 1 | <a href="#">Akt</a>                                                         |
| Gastric cancer                                           | 154 | 1 | 1.646 | 1 | 1 | <a href="#">Akt</a>                                                         |
| Inflammatory mediator regulation of TRP channels         | 162 | 1 | 1.732 | 1 | 1 | <a href="#">phospholipase A2</a>                                            |
| Hepatitis B                                              | 163 | 1 | 1.743 | 1 | 1 | <a href="#">Akt</a>                                                         |
| Arachidonic acid metabolism                              | 164 | 1 | 1.753 | 1 | 1 | <a href="#">phospholipase A2</a>                                            |
| MAPK signaling pathway                                   | 299 | 2 | 3.196 | 1 | 1 | <a href="#">protein phosphatase 1A; Akt</a>                                 |

|                                                 |     |   |       |   |   |                                                   |
|-------------------------------------------------|-----|---|-------|---|---|---------------------------------------------------|
| MicroRNAs in cancer                             | 303 | 2 | 3.239 | 1 | 1 | <a href="#">fascin 1; notch2</a>                  |
| Influenza A                                     | 169 | 1 | 1.807 | 1 | 1 | <a href="#">Akt</a>                               |
| RNA transport                                   | 169 | 1 | 1.807 | 1 | 1 | <a href="#">eIF-4E</a>                            |
| Drug metabolism - cytochrome P450               | 169 | 1 | 1.807 | 1 | 1 | <a href="#">glutathione S-transferase</a>         |
| Cell adhesion molecules (CAMs)                  | 171 | 1 | 1.828 | 1 | 1 | <a href="#">sialoadhesin</a>                      |
| Ribosome                                        | 174 | 1 | 1.860 | 1 | 1 | <a href="#">ribosomal protein L36</a>             |
| Axon guidance                                   | 181 | 1 | 1.935 | 1 | 1 | <a href="#">tyrosine-protein kinase Fyn</a>       |
| Necroptosis                                     | 186 | 1 | 1.988 | 1 | 1 | <a href="#">ferritin heavy chain</a>              |
| Steroid hormone biosynthesis                    | 188 | 1 | 2.010 | 1 | 1 | <a href="#">7 beta-estradiol 17-dehydrogenase</a> |
| Metabolism of xenobiotics by cytochrome P450    | 188 | 1 | 2.010 | 1 | 1 | <a href="#">glutathione S-transferase</a>         |
| Cellular senescence                             | 190 | 1 | 2.031 | 1 | 1 | <a href="#">Akt</a>                               |
| Chemical carcinogenesis                         | 194 | 1 | 2.074 | 1 | 1 | <a href="#">glutathione S-transferase</a>         |
| Chemokine signaling pathway                     | 203 | 1 | 2.170 | 1 | 1 | <a href="#">Akt</a>                               |
| NOD-like receptor signaling pathway             | 215 | 1 | 2.298 | 1 | 1 | <a href="#">14-3-3 protein epsilon</a>            |
| Kaposi sarcoma-associated herpesvirus infection | 221 | 1 | 2.363 | 1 | 1 | <a href="#">Akt</a>                               |
| Regulation of actin cytoskeleton                | 221 | 1 | 2.363 | 1 | 1 | <a href="#">myosin heavy chain 9/10/11/14</a>     |
| Viral carcinogenesis                            | 231 | 1 | 2.470 | 1 | 1 | <a href="#">14-3-3 protein epsilon</a>            |
| Epstein-Barr virus infection                    | 232 | 1 | 2.480 | 1 | 1 | <a href="#">Akt</a>                               |
| Human immunodeficiency virus 1 infection        | 243 | 1 | 2.598 | 1 | 1 | <a href="#">Akt</a>                               |
| Neuroactive ligand-receptor interaction         | 402 | 2 | 4.298 | 1 | 1 | <a href="#">glycine; complement component 5</a>   |
| Human T-cell leukemia virus 1 infection         | 251 | 1 | 2.683 | 1 | 1 | <a href="#">Akt</a>                               |

|                                        |      |   |        |   |   |                                 |
|----------------------------------------|------|---|--------|---|---|---------------------------------|
| Human cytomegalovirus infection        | 261  | 1 | 2.790  | 1 | 1 | Akt                             |
| Endocytosis                            | 275  | 1 | 2.940  | 1 | 1 | vacuolar protein sorting 36     |
| Herpes simplex virus 1 infection       | 439  | 2 | 4.693  | 1 | 1 | complement component 5; Akt     |
| Cytokine-cytokine receptor interaction | 296  | 1 | 3.164  | 1 | 1 | interleukin 19                  |
| Olfactory transduction                 | 1141 | 1 | 12.198 | 1 | 1 | cGMP-dependent protein kinase 1 |

**Table S2.**

**Joint pathway analysis of cardiac metabolomics and proteomics.**

Integrative analysis of proteomics (n=4) and metabolomics (n=5) data at pathway level of WT and MCJ<sup>KO</sup> hearts. Differentially encountered metabolites (in orange) and proteins (in blue) were analyzed (p<0.05) by Joint Pathway Analysis using MetaboAnalyst 5.0.

**Table S3.**

**Raw data.**

Excel spreadsheet including all the raw data belonging to the graphs included in the manuscript.
